# Supplementary material
Source: publisher figshare collection journal article supplement (https://acs.figshare.com/ndownloader/files/22438448)

Supporting information

## Structure-activity Relationship of SPOP Inhibitors Against Kidney Cancer

Ze Dong,<sup>†,§</sup> Zhen Wang,<sup>¶,†,§</sup> Zhong-Qiang Guo,<sup>△,#</sup> Shouzhe Gong,<sup>†</sup> Tao Zhang,<sup>†</sup> Jiang Liu,<sup>#</sup>  
Cheng Luo,<sup>†,‡</sup> Hualiang Jiang,<sup>†,‡,Σ</sup> Cai-Guang Yang<sup>†,‡,\*</sup>

<sup>†</sup> State Key Laboratory of Drug Research, Shanghai Institute of Materia Medica, Chinese Academy of Sciences, Shanghai 201203, China

<sup>¶</sup> College of Pharmacy, Nanjing University of Chinese Medicine, Nanjing 210023, China

<sup>△</sup> Department of Urology, Zhongnan Hospital of Wuhan University, Hubei 430071, China

<sup>#</sup> CAS Key Laboratory of Genome Sciences and Information, Beijing Institute of Genomics, Chinese Academy of Sciences, Beijing 100101, China

<sup>‡</sup> School of Pharmaceutical Science and Technology, Hangzhou Institute for Advanced Study, UCAS, Hangzhou 310024, China

<sup>Σ</sup> Shanghai Institute for Advanced Immunochemical Studies, ShanghaiTec University, Shanghai 201210, China

<sup>§</sup> Z.D. and Z.W. contributed equally.

|                                                                   |     |
|-------------------------------------------------------------------|-----|
| Table S1                                                          | S1  |
| Table S2                                                          | S2  |
| Figure S1 Representative nanoDSF traces                           | S3  |
| Figure S2 Binding of compound <b>6lc</b> and the full-length SPOP | S4  |
| <sup>1</sup> H and <sup>13</sup> C NMR Spectra                    | S5  |
| Representative HPLC                                               | S20 |

**Table S1.** T<sub>m</sub> shift when SPOP<sup>MATH</sup> was incubated with compounds

| Compound    | $\Delta T_m$ (°C) |      | Compound   | $\Delta T_m$ (°C) |      |
|-------------|-------------------|------|------------|-------------------|------|
|             | 10 ×              | 20 × |            | 10 ×              | 20 × |
| <b>DMSO</b> | -1.7              | -3.8 | <b>6lc</b> | 3.1               | 3.5  |
| <b>6b</b>   | 2.8               | 4.0  | <b>6ld</b> | 3.5               | 3.7  |
| <b>6c</b>   | 0                 | 0.2  | <b>6lf</b> | 5.3               | 4.5  |
| <b>6d</b>   | 1.8               | 2.1  | <b>6lg</b> | 1.6               | 1.7  |
| <b>6e</b>   | 2.5               | 3.6  | <b>6lh</b> | 2.7               | 2.4  |
| <b>6f</b>   | 2.5               | 2.9  | <b>6li</b> | 2.7               | 2.7  |
| <b>6g</b>   | 2.4               | 3.5  | <b>6lj</b> | 4.0               | 3.8  |
| <b>6h</b>   | 2.3               | 3.5  | <b>6lk</b> | 1.4               | 2.5  |
| <b>6i</b>   | 3.7               | 5.3  | <b>6ll</b> | 2.2               | 2.6  |
| <b>6k</b>   | 0.6               | 1.4  | <b>7a</b>  | 0.8               | 2.1  |
| <b>6l</b>   | 3.2               | 5.1  | <b>7b</b>  | 1.1               | 2.1  |
| <b>6m</b>   | 0.5               | 1.1  | <b>7c</b>  | 3.7               | 4.0  |
| <b>6n</b>   | 1.4               | 2.3  | <b>7d</b>  | 0.8               | 1.6  |
| <b>6o</b>   | 1.1               | 2.3  | <b>7f</b>  | 4.9               | 5.3  |
| <b>6p</b>   | 0.1               | 1.5  | <b>7g</b>  | 1.7               | 1.9  |
| <b>6q</b>   | 0.4               | 1.4  | <b>7h</b>  | 0.6               | 0.9  |
| <b>6r</b>   | 4.3               | 6.1  | <b>7i</b>  | 1.0               | 1.0  |
| <b>6s</b>   | 0.3               | 0.8  | <b>7j</b>  | 0.9               | 1.3  |
| <b>6t</b>   | 1.4               | 1.3  | <b>8c</b>  | 2.3               | 3.7  |
| <b>6u</b>   | 1.6               | 1.6  | <b>8a</b>  | 0.2               | 1.6  |
| <b>6v</b>   | 0.9               | 0.8  | <b>8b</b>  | 3.5               | 5.3  |
| <b>6w</b>   | 1.6               | 1.8  | <b>11b</b> | 0.2               | 1.3  |
| <b>6x</b>   | 0.4               | 0.9  | <b>12a</b> | 0.9               | 2.1  |
| <b>6y</b>   | 0.4               | 0.8  | <b>12b</b> | -7.4              | 1.4  |
| <b>6la</b>  | 2.8               | 2.6  | <b>14a</b> | -0.2              | 2.0  |
| <b>6lb</b>  | 3.1               | 3.3  | <b>14b</b> | -0.4              | 1.2  |

$\Delta T_m$  (°C) for DMSO-treated SPOP<sup>MATH</sup> was calculated using naive SPOP<sup>MATH</sup> sample as the reference, while  $\Delta T_m$  data for compound-treated SPOP<sup>MATH</sup> were reported using DMSO-treated SPOP<sup>MATH</sup> as the reference.

**Table S2.** Antiproliferative activities of compounds on A498 and OS-RC-2 cell lines

| Compound   | Inhibition @ 30 $\mu$ M (%) |         | Compound   | Inhibition @ 30 $\mu$ M (%) |         |
|------------|-----------------------------|---------|------------|-----------------------------|---------|
|            | A498                        | OS-RC-2 |            | A498                        | OS-RC-2 |
| <b>6b</b>  | 88                          | 90      | <b>6li</b> | 90                          | 90      |
| <b>6c</b>  | 32                          | 22      | <b>6lj</b> | 83                          | 81      |
| <b>6d</b>  | 91                          | 94      | <b>6lk</b> | 75                          | 77      |
| <b>6e</b>  | 90                          | 89      | <b>6ll</b> | 62                          | 56      |
| <b>6f</b>  | 90                          | 88      | <b>7a</b>  | 27                          | 23      |
| <b>6g</b>  | 90                          | 97      | <b>7b</b>  | 38                          | 35      |
| <b>6h</b>  | 89                          | 96      | <b>7c</b>  | 24                          | 20      |
| <b>6i</b>  | 89                          | 92      | <b>7d</b>  | 42                          | 48      |
| <b>6j</b>  | 61                          | 74      | <b>7e</b>  | 51                          | 49      |
| <b>6k</b>  | 86                          | 89      | <b>7f</b>  | 38                          | 49      |
| <b>6l</b>  | 90                          | 82      | <b>7g</b>  | 59                          | 56      |
| <b>6m</b>  | 35                          | 40      | <b>7h</b>  | 24                          | 26      |
| <b>6n</b>  | 90                          | 91      | <b>7i</b>  | 51                          | 10      |
| <b>6o</b>  | 50                          | 36      | <b>7j</b>  | 33                          | 16      |
| <b>6p</b>  | 27                          | 35      | <b>8a</b>  | 18                          | 22      |
| <b>6q</b>  | 58                          | 46      | <b>8b</b>  | 21                          | 29      |
| <b>6r</b>  | 48                          | 34      | <b>8c</b>  | 13                          | 28      |
| <b>6s</b>  | 12                          | 23      | <b>8d</b>  | 35                          | 46      |
| <b>6t</b>  | 37                          | 22      | <b>8e</b>  | 51                          | 32      |
| <b>6u</b>  | 59                          | 62      | <b>8f</b>  | 43                          | 40      |
| <b>6v</b>  | 11                          | 15      | <b>8g</b>  | 39                          | 39      |
| <b>6w</b>  | 57                          | 66      | <b>8h</b>  | 4                           | 22      |
| <b>6x</b>  | 37                          | 37      | <b>8i</b>  | 24                          | 23      |
| <b>6y</b>  | 55                          | 51      | <b>8j</b>  | 32                          | 31      |
| <b>6z</b>  | 17                          | 38      | <b>11a</b> | 15                          | 19      |
| <b>6la</b> | 62                          | 58      | <b>11b</b> | 14                          | 15      |
| <b>6lb</b> | 86                          | 82      | <b>12a</b> | 33                          | 24      |
| <b>6lc</b> | 85                          | 90      | <b>12b</b> | 21                          | 15      |
| <b>6ld</b> | 85                          | 52      | <b>13a</b> | 8                           | 14      |
| <b>6le</b> | 12                          | 21      | <b>13b</b> | 13                          | 30      |
| <b>6lf</b> | 87                          | 75      | <b>14a</b> | 25                          | 16      |
| <b>6lg</b> | 60                          | 50      | <b>14b</b> | 38                          | 11      |
| <b>6lh</b> | 86                          | 83      |            |                             |         |

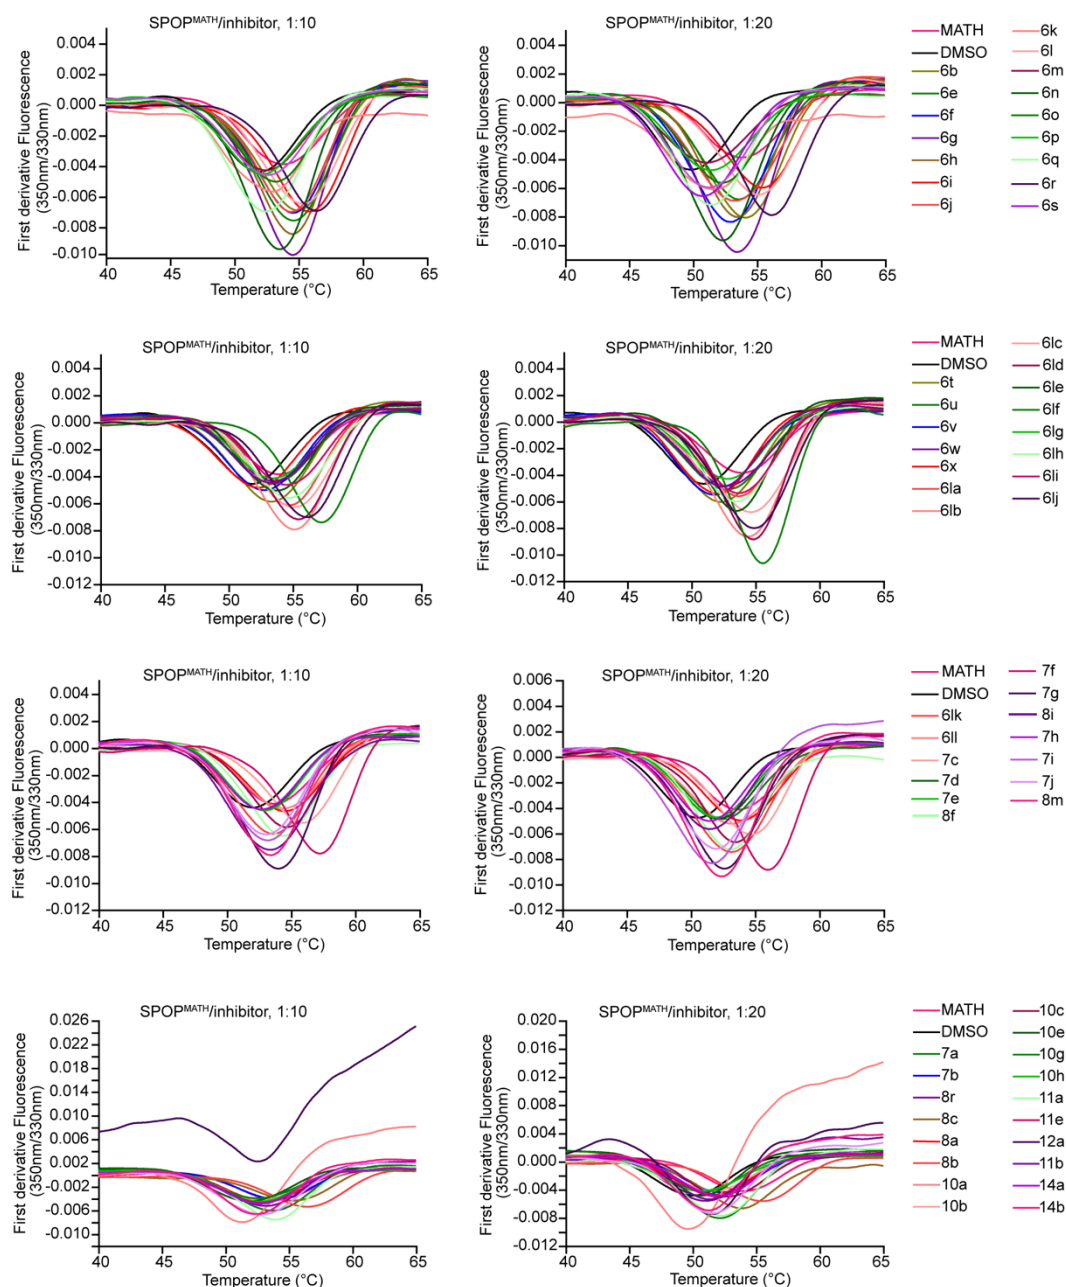

**Figure S1** Representative nanoDSF traces for all compounds.

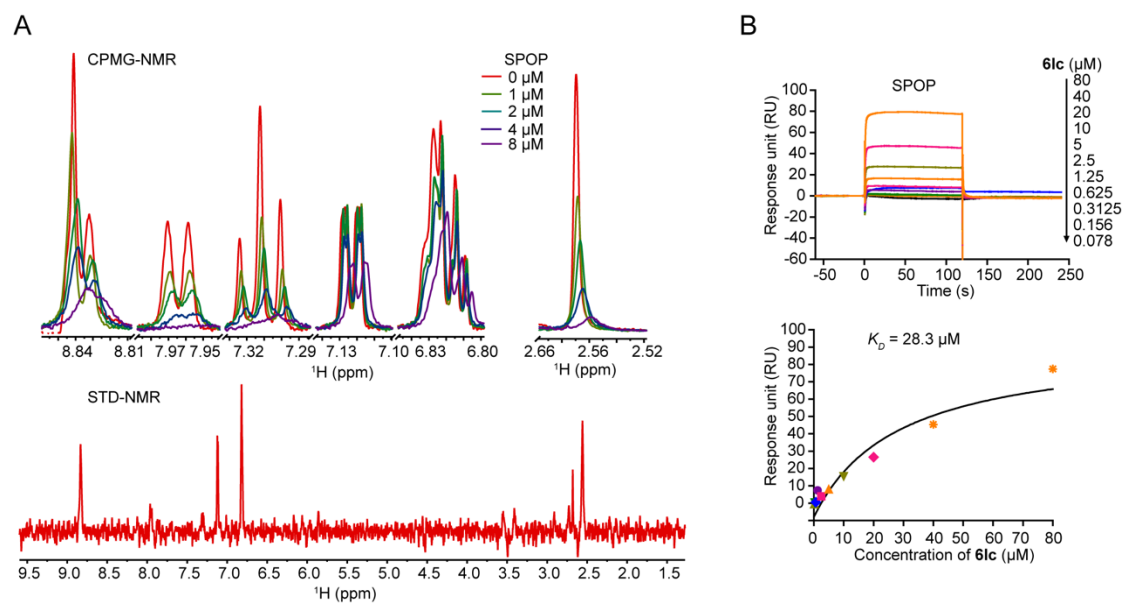

**Figure S2** Interaction of **61c** and full-length SPOP. (A) NMR measurement of **61c** interaction with SPOP. The STD-NMR spectrum is recorded for **61c** at 200  $\mu\text{M}$  with SPOP. (B) SPR measurement of compound **61c** binding to SPOP. Graphs of equilibrium RU responses versus **61c** concentrations are plotted. The estimated  $K_D$  is 28.3  $\mu\text{M}$ .

**NMR spectrum**  
**Compound 6b**

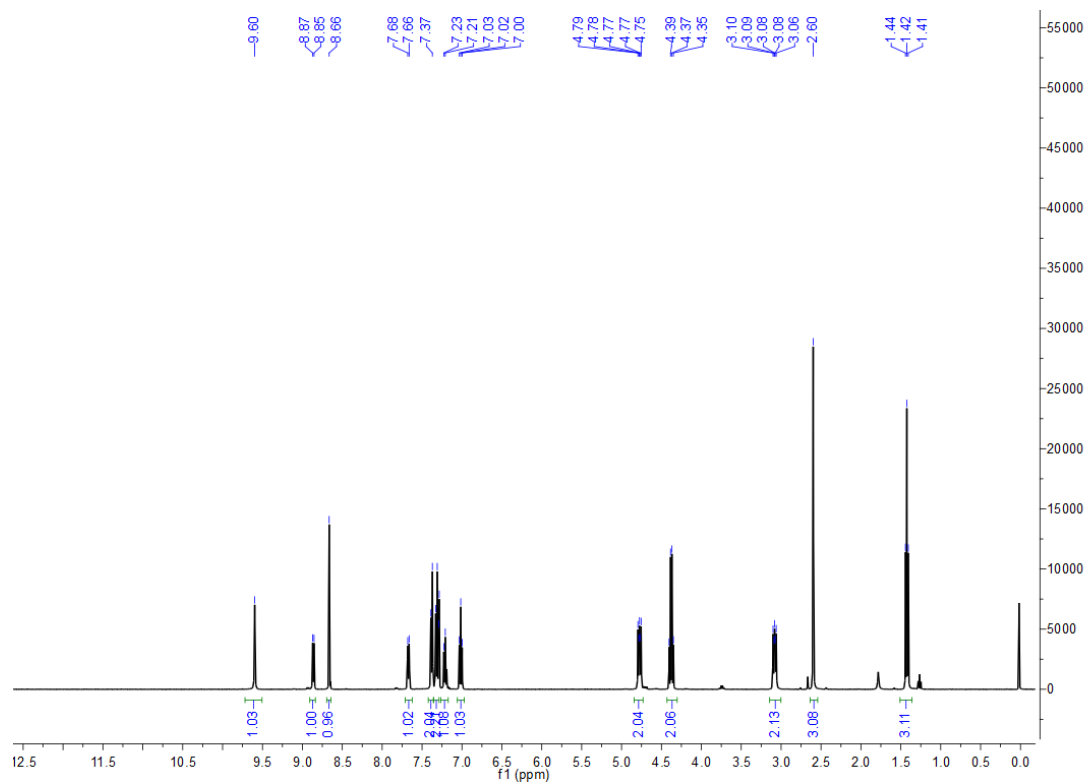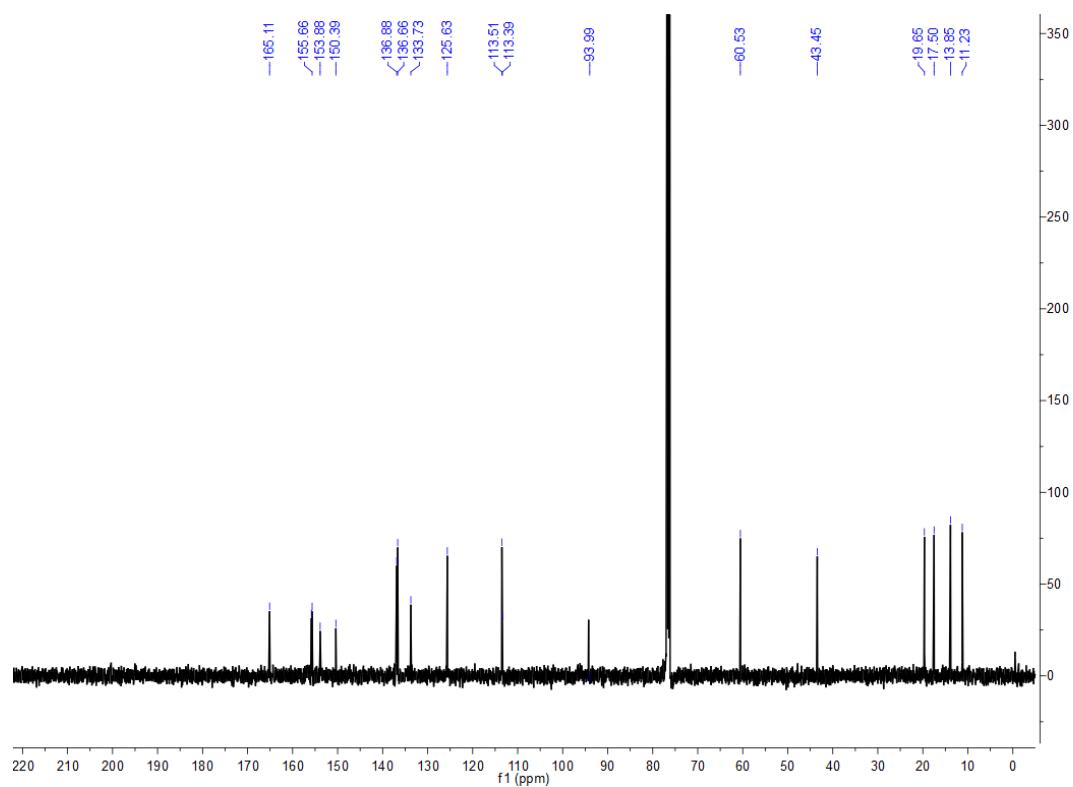

# Compound 6d

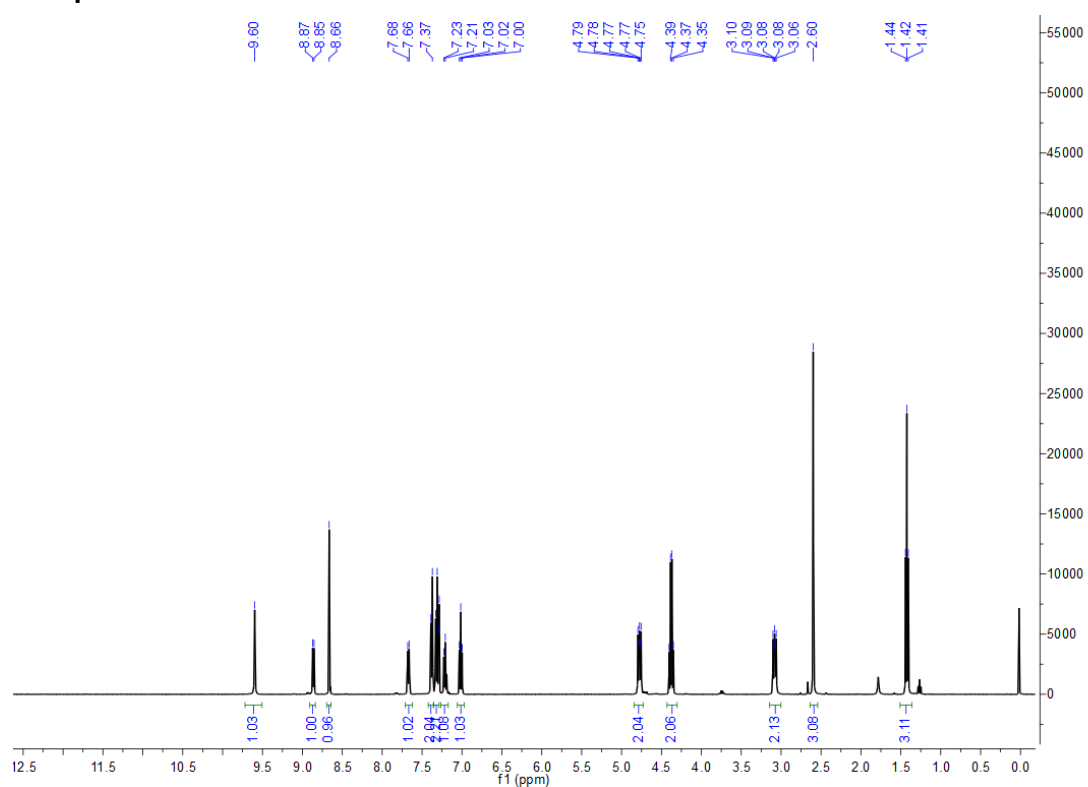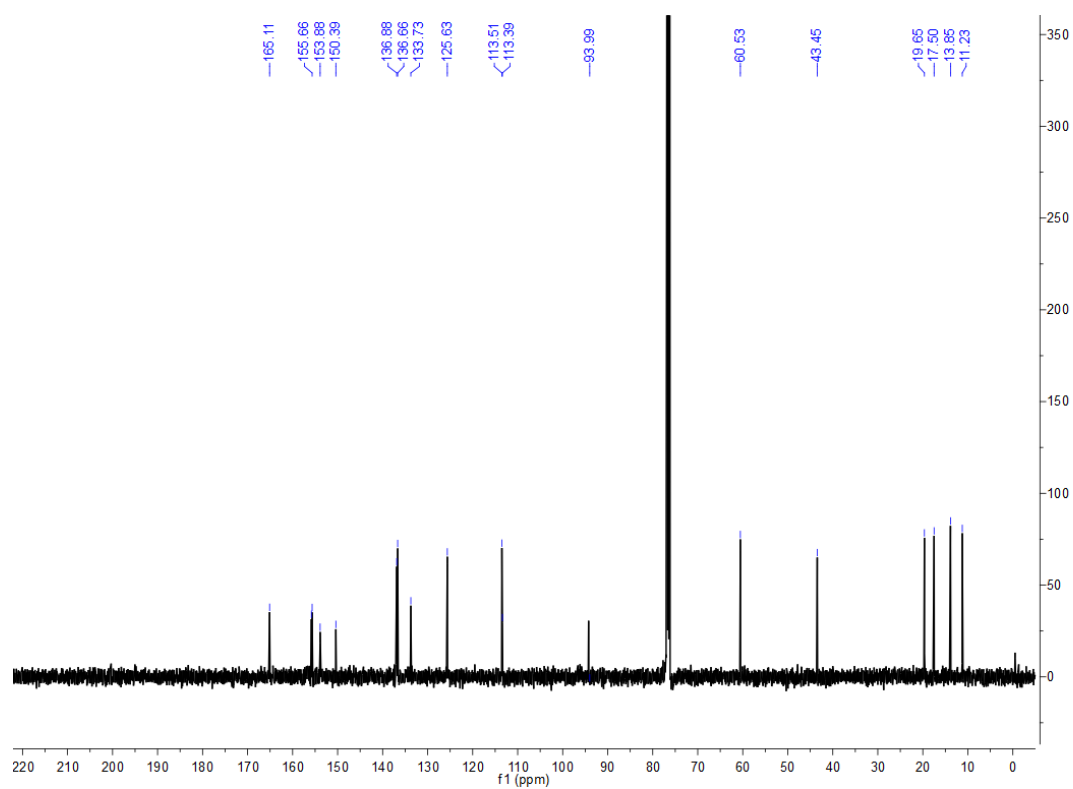

# Compound 6g

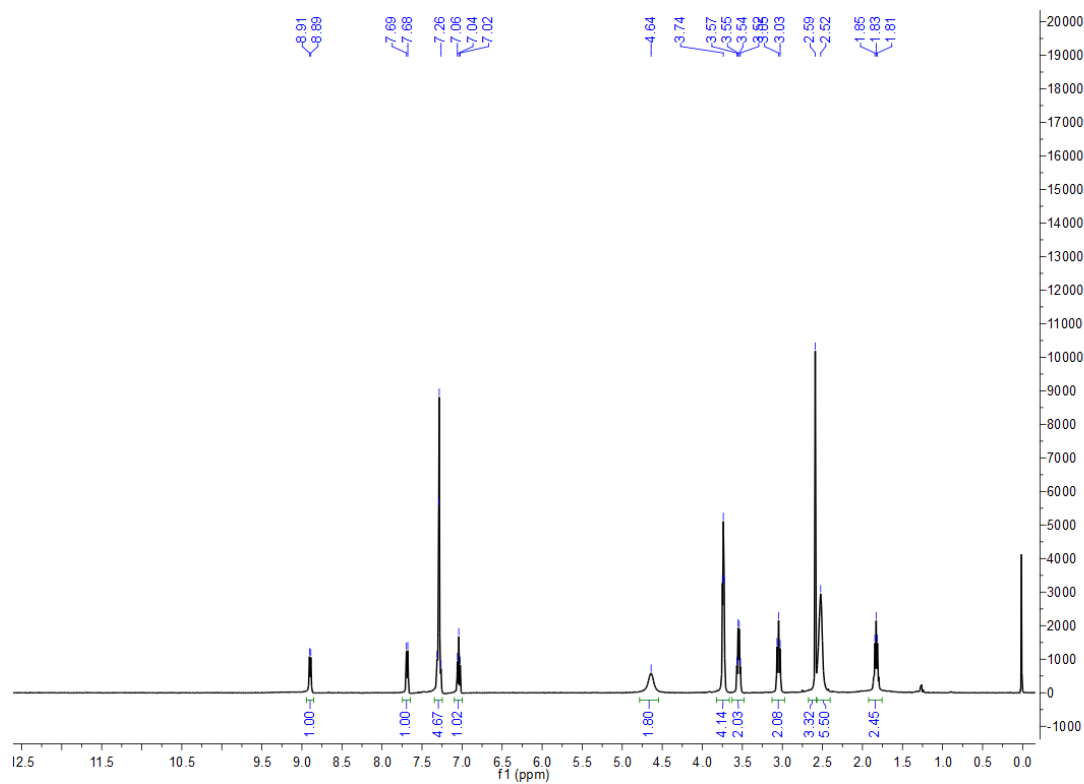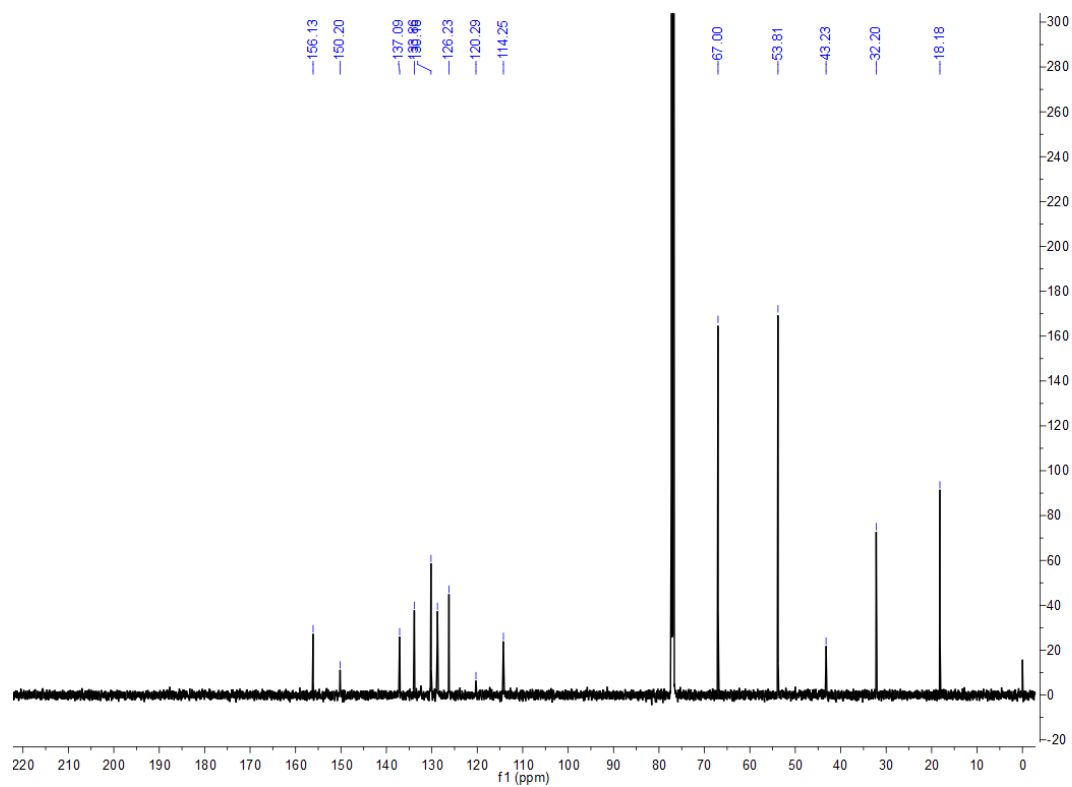



# Compound 6h

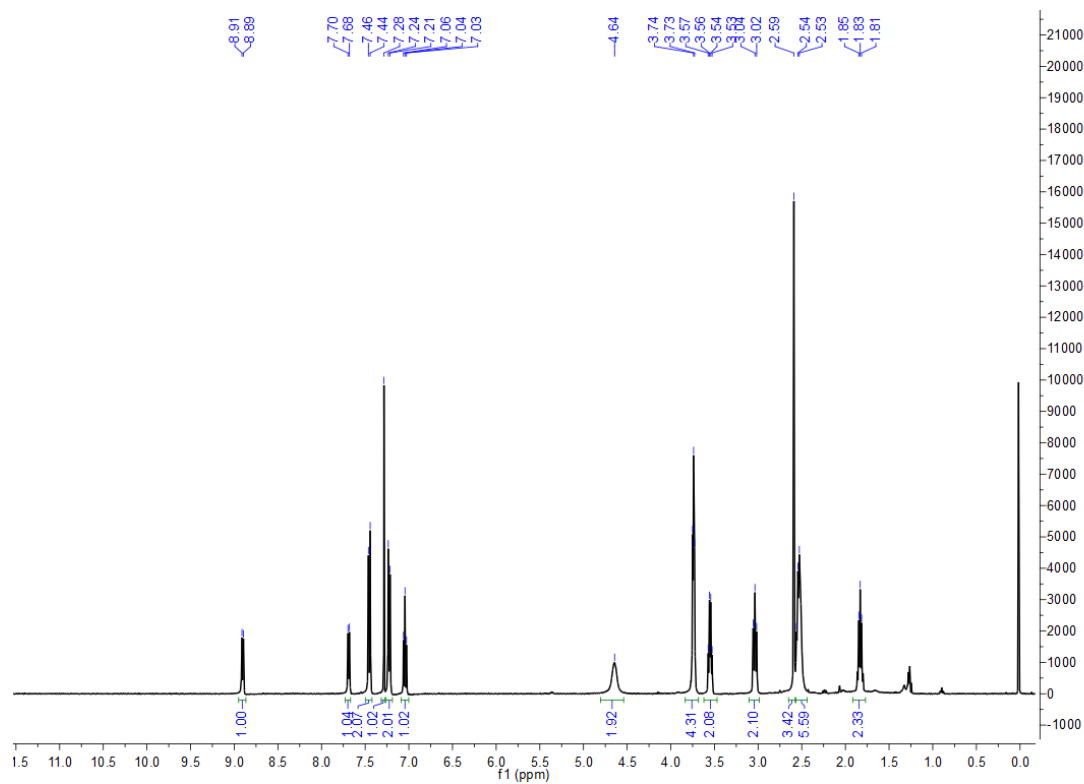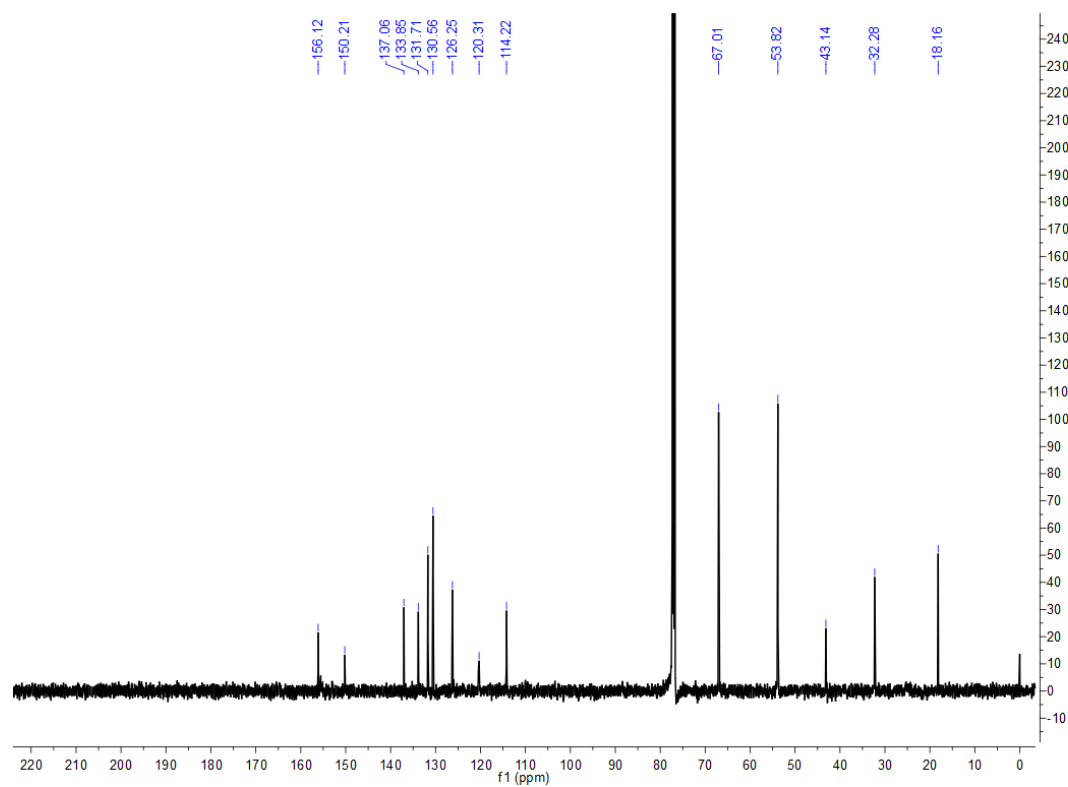

# Compound 6k

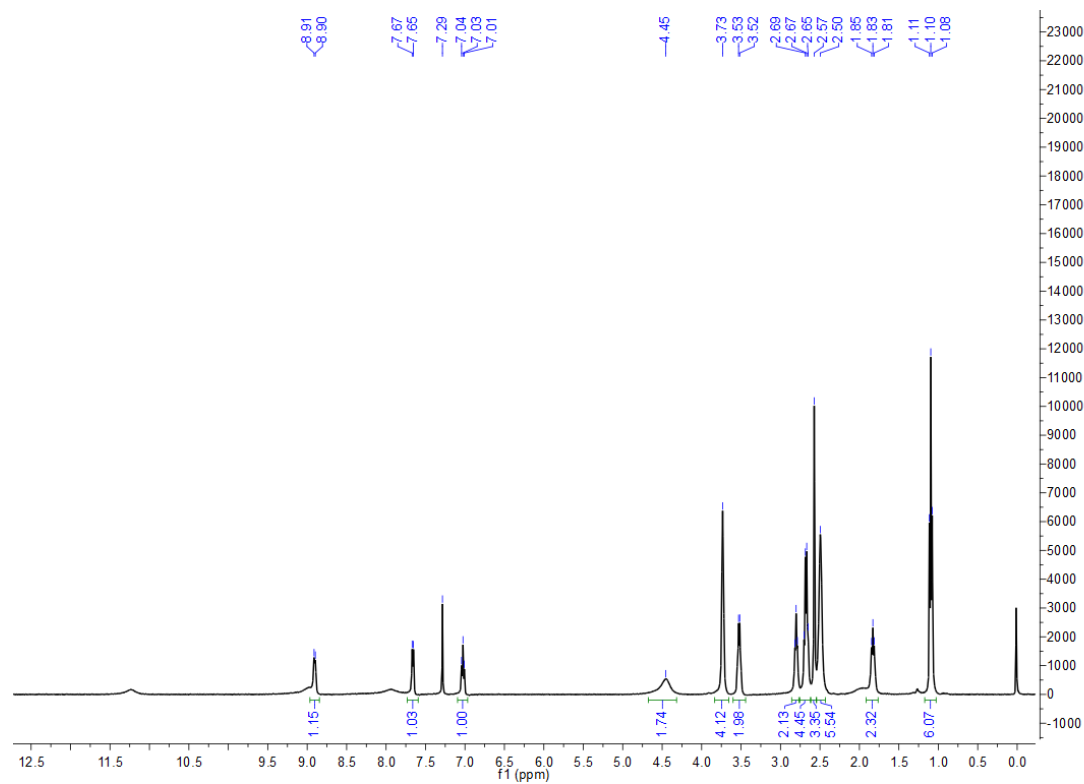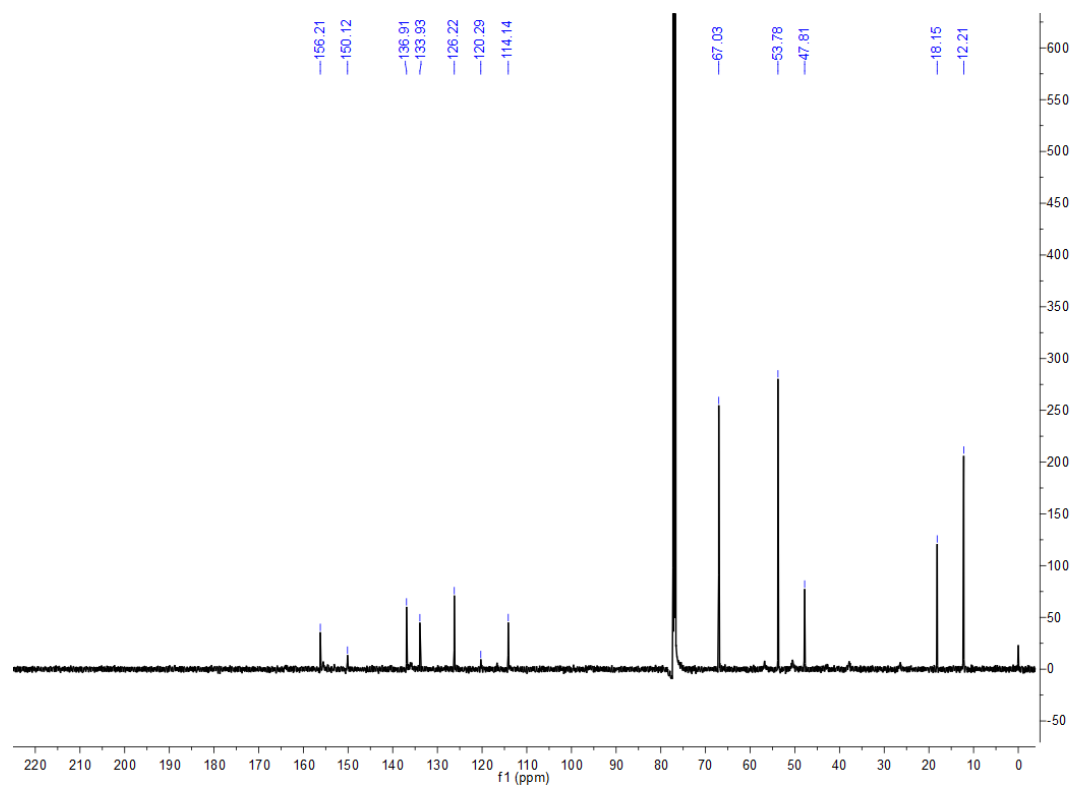

# Compound 6m

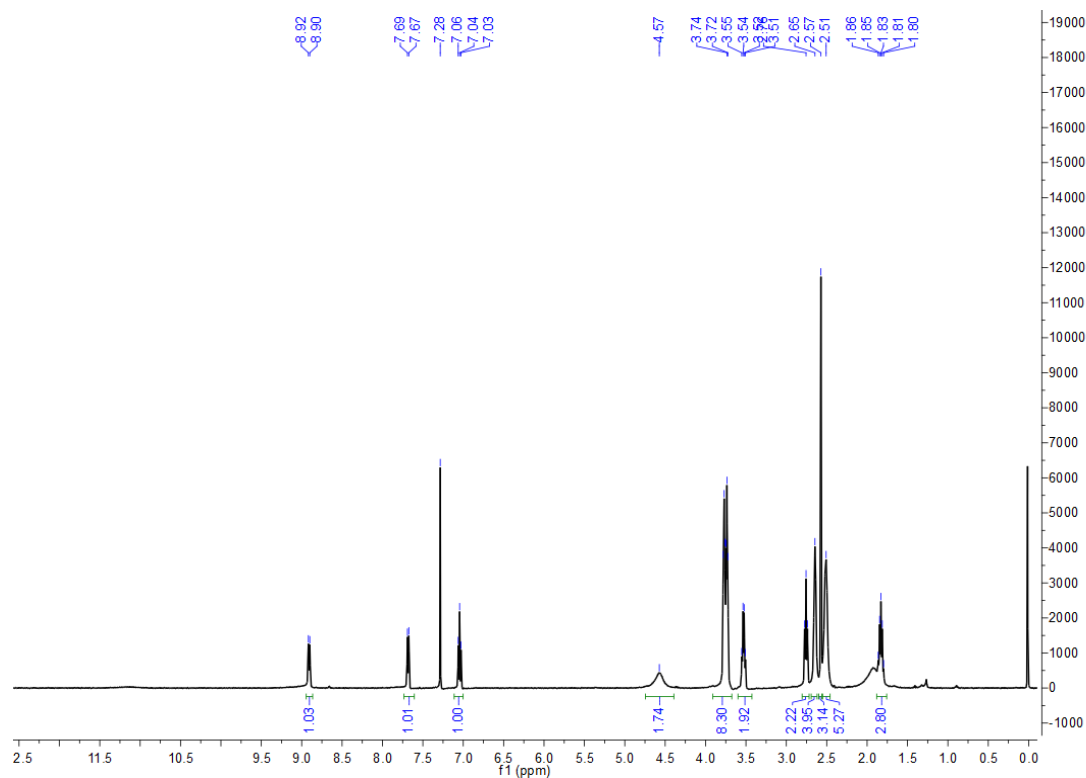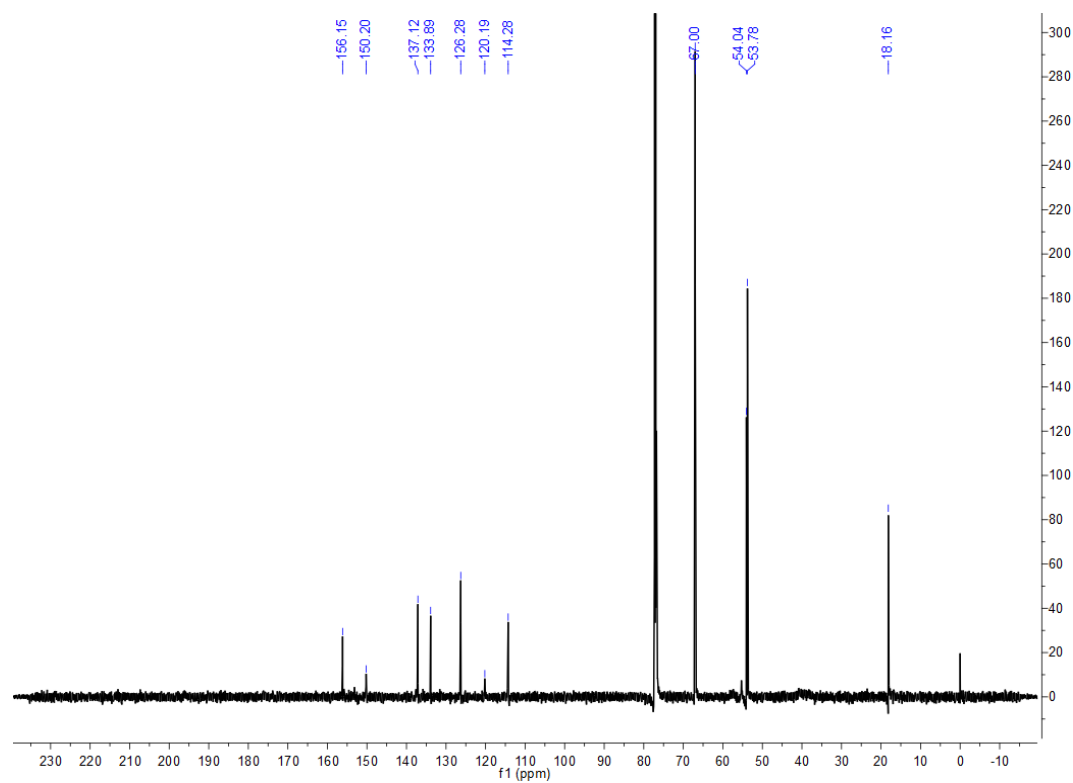

# Compound 6w

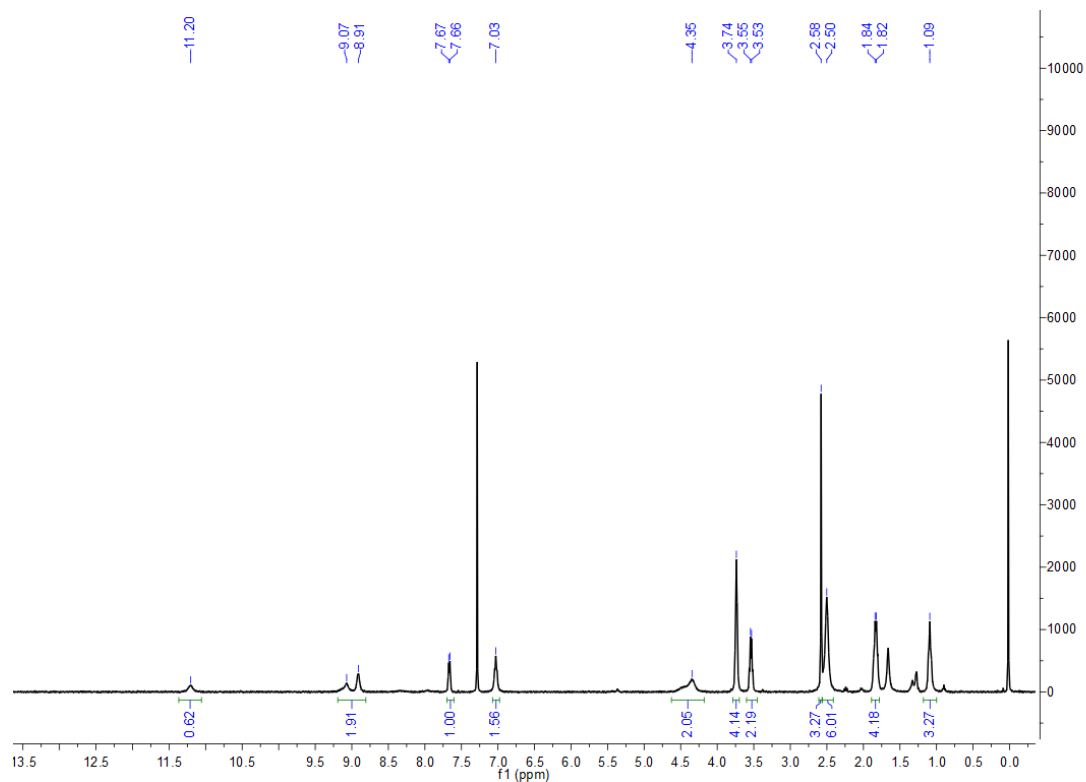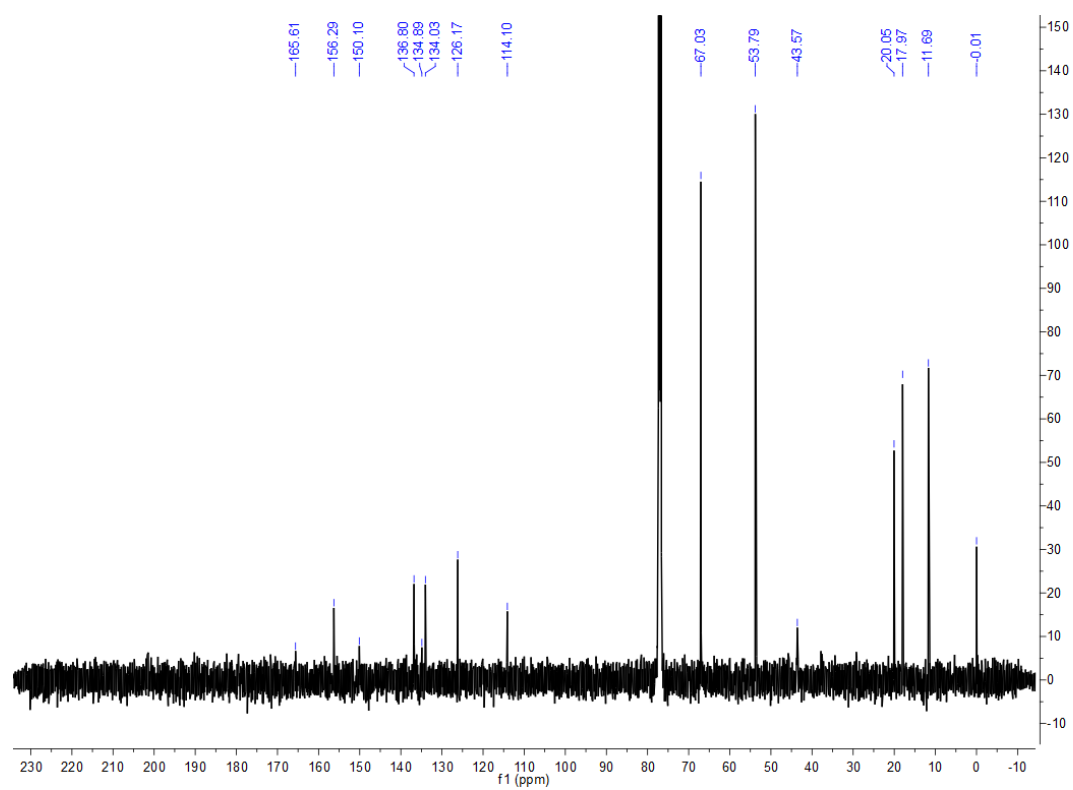

# Compound 6z

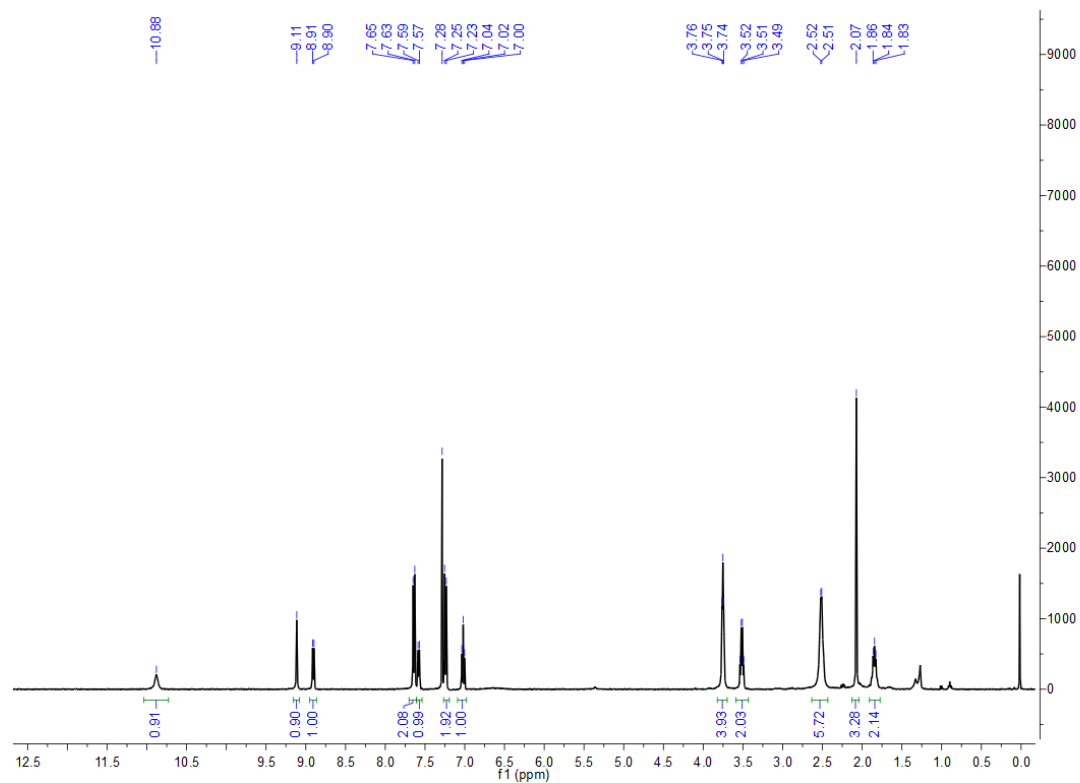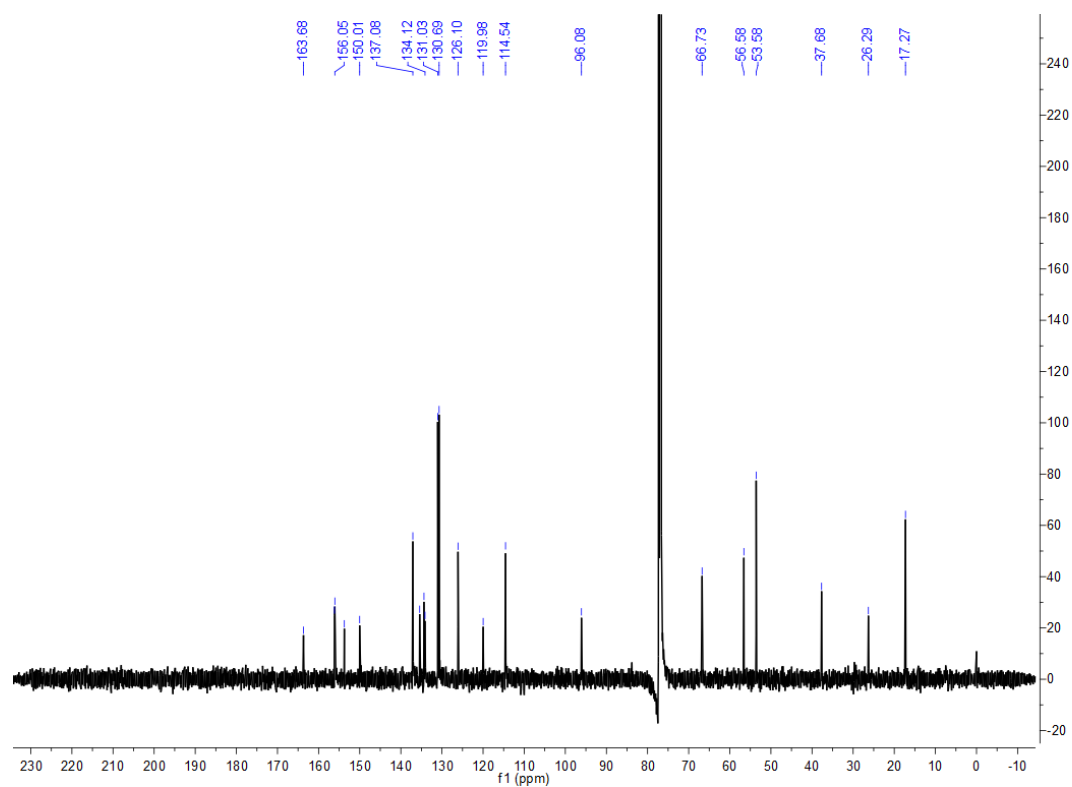

# Compound 6lc

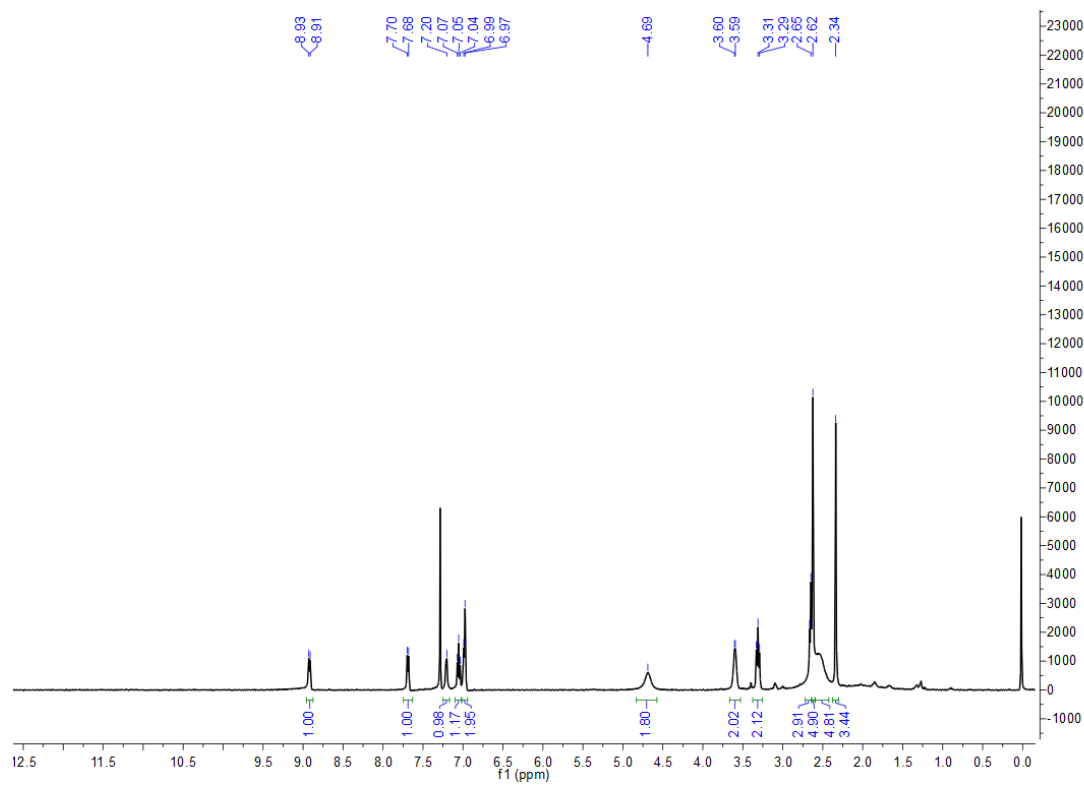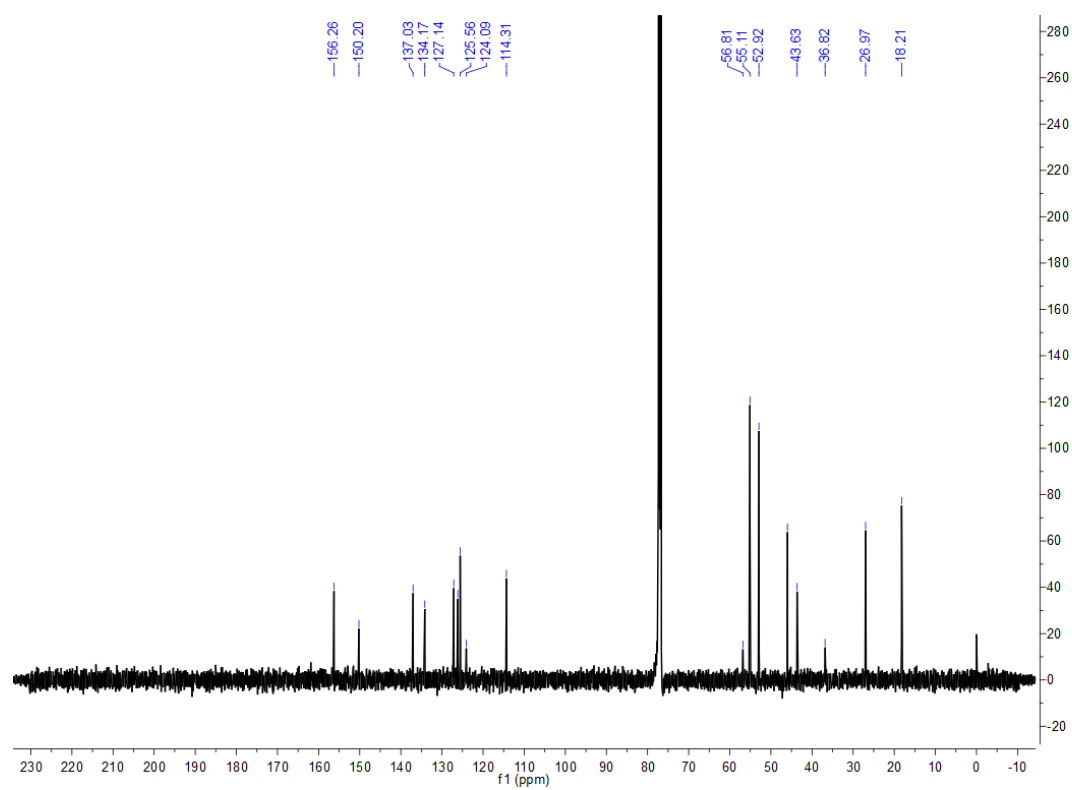

# Compound 7a

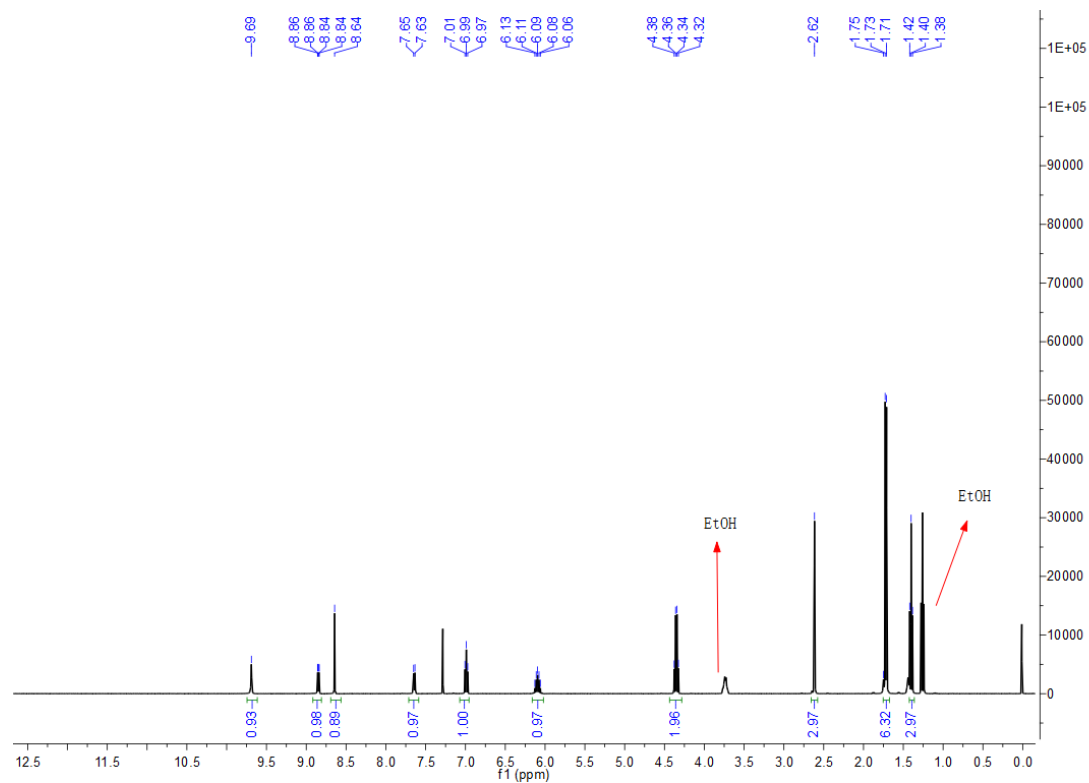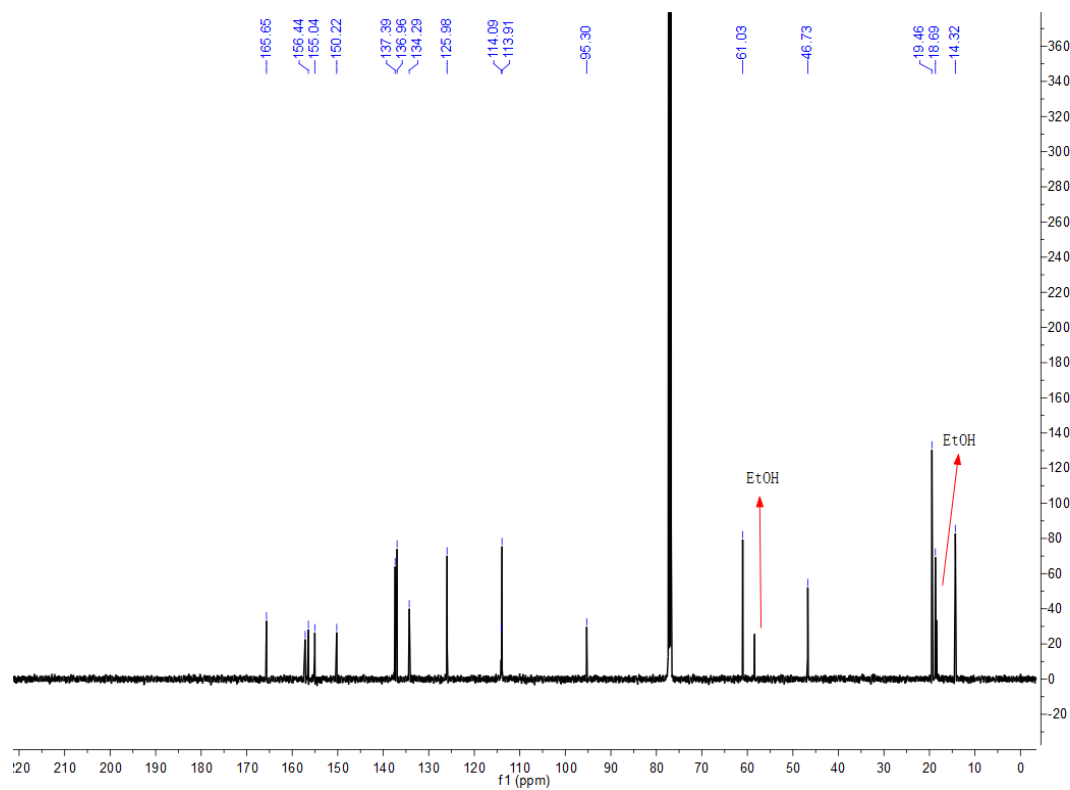

# Compound 7b

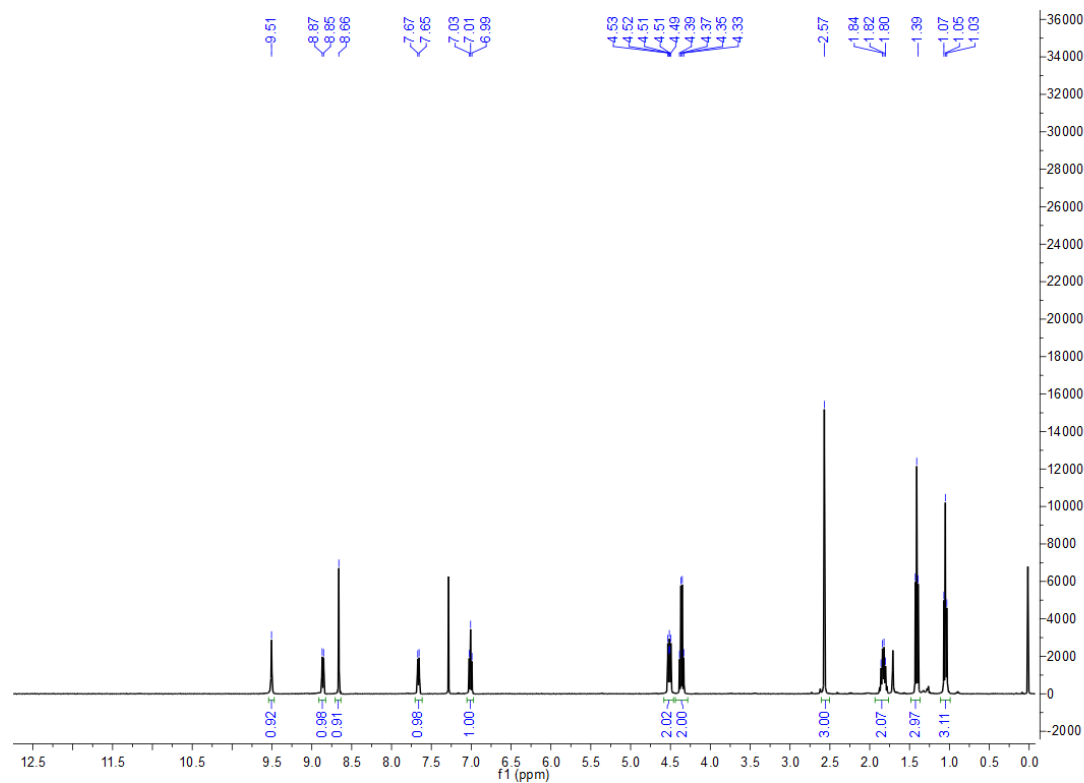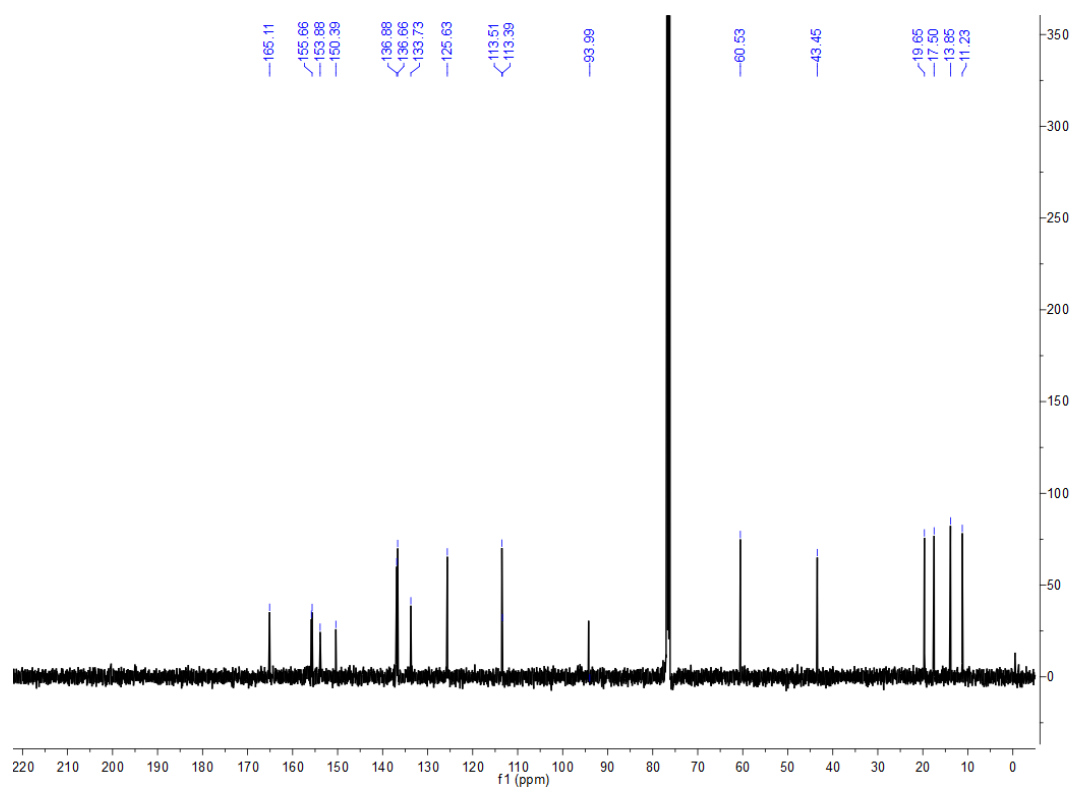



# Compound 7c

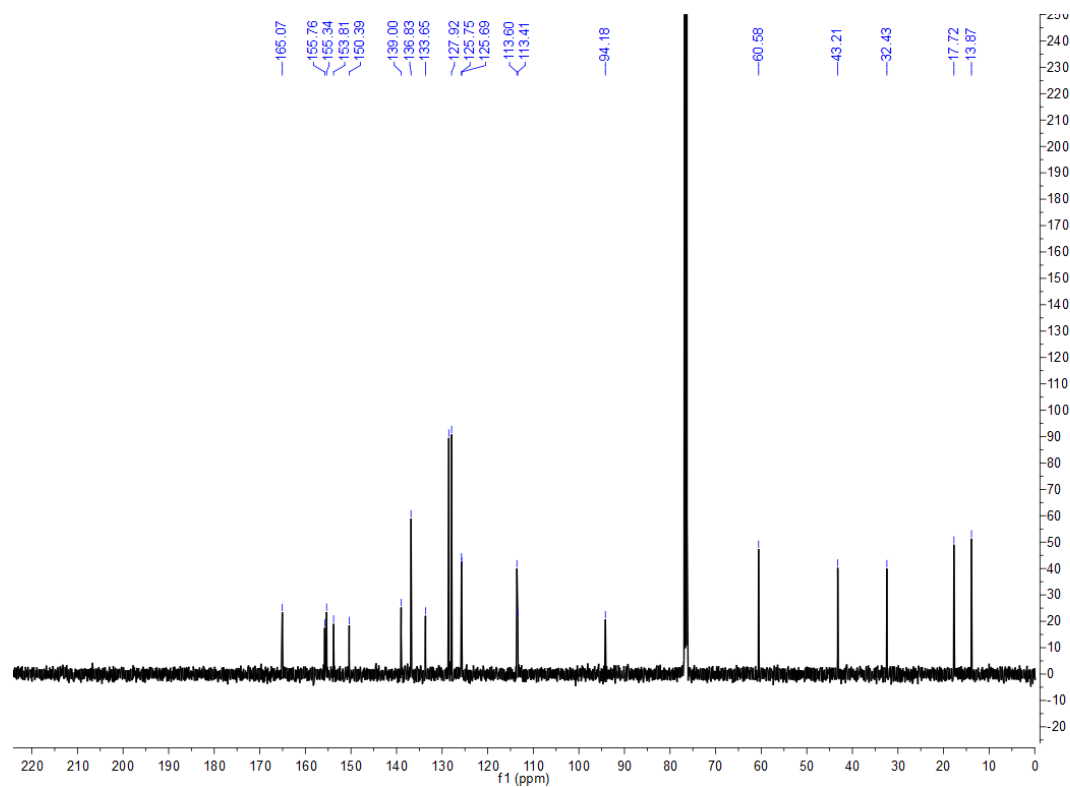

# Compound 7e

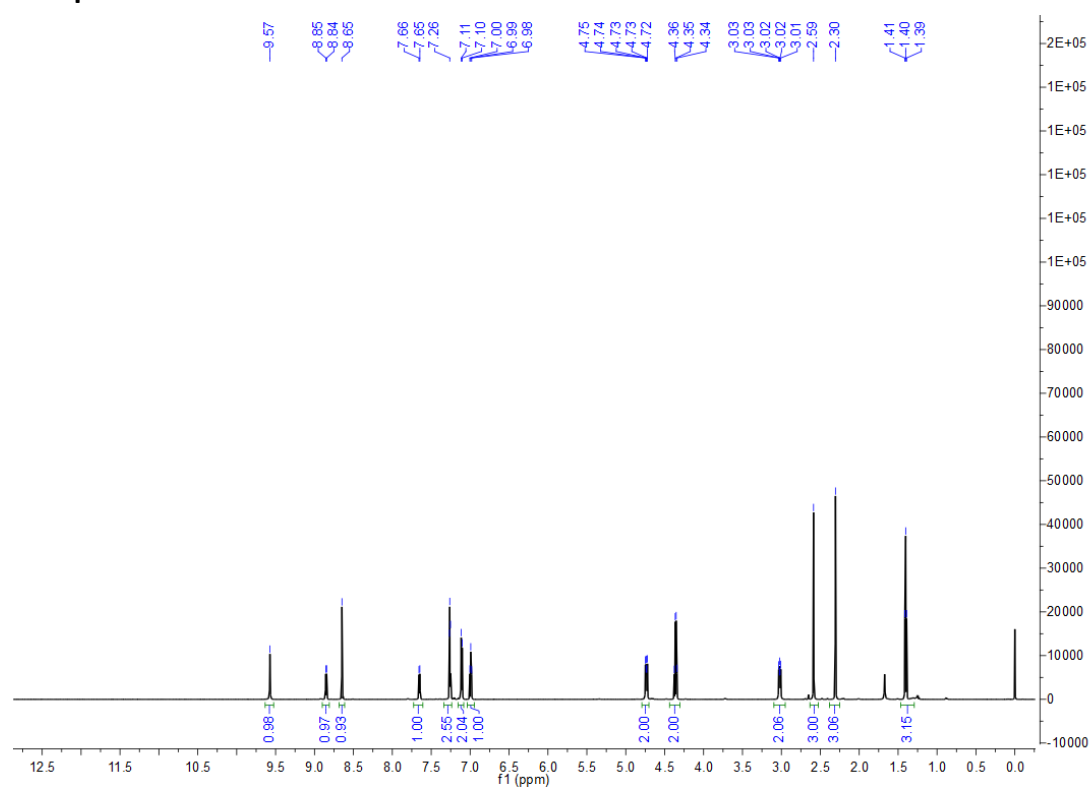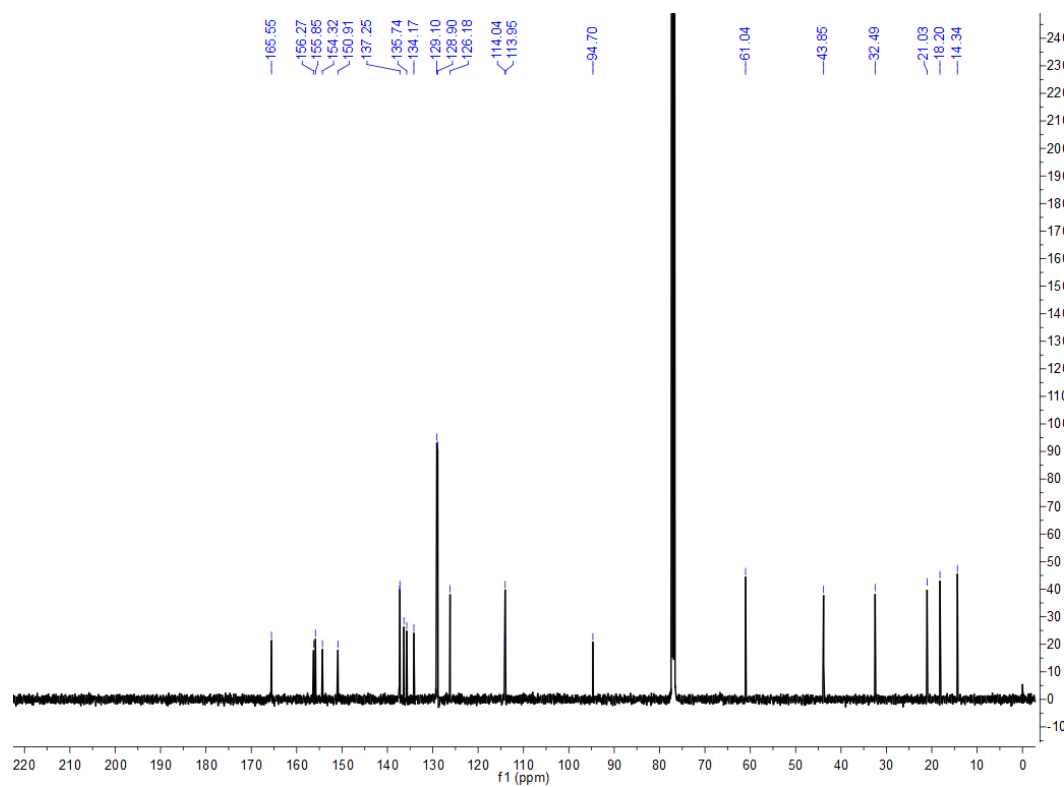

# Compound 7i

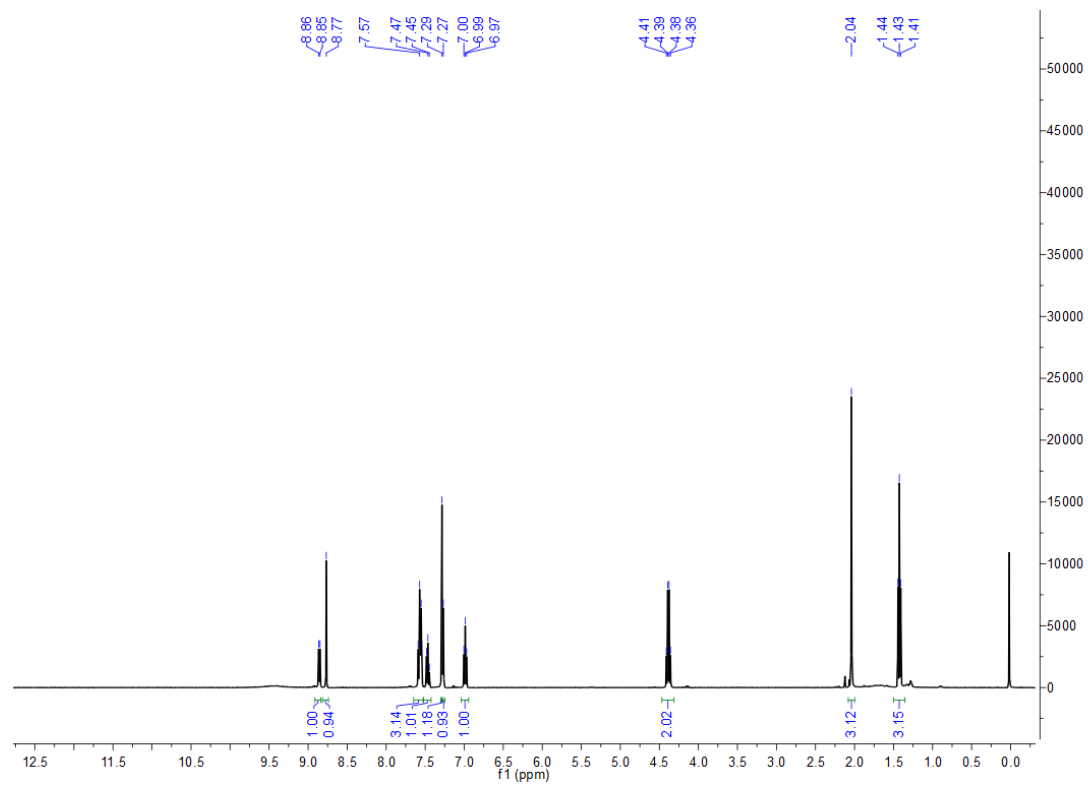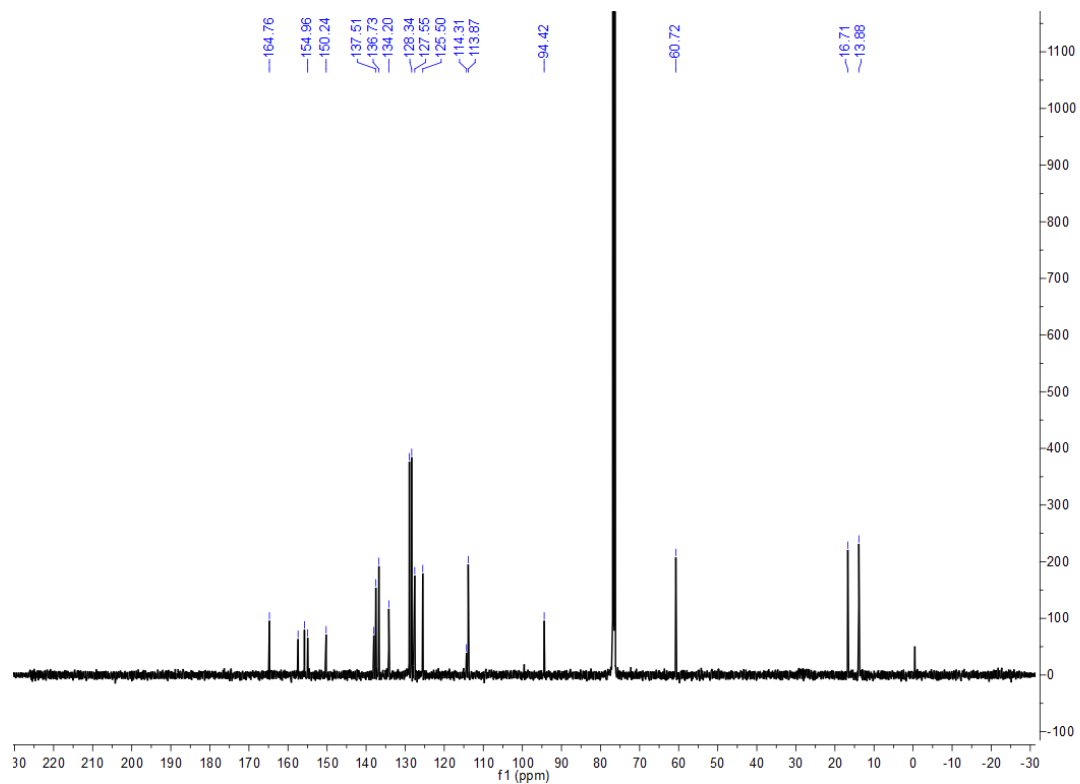

# Compound 12a

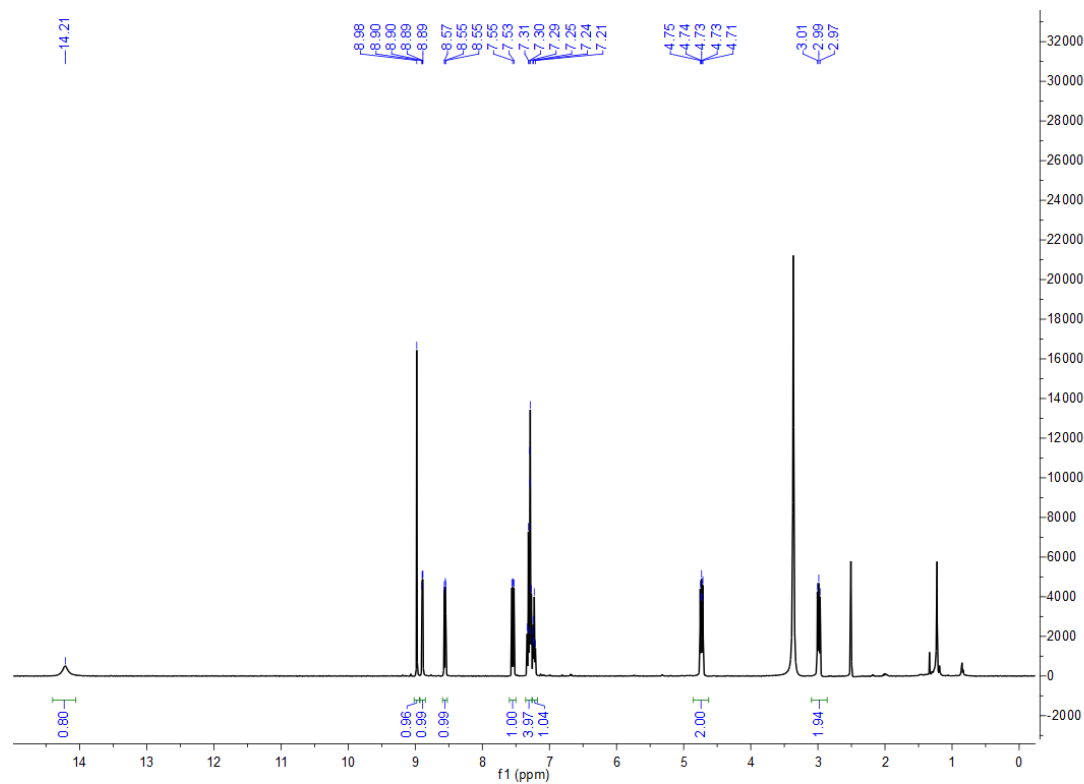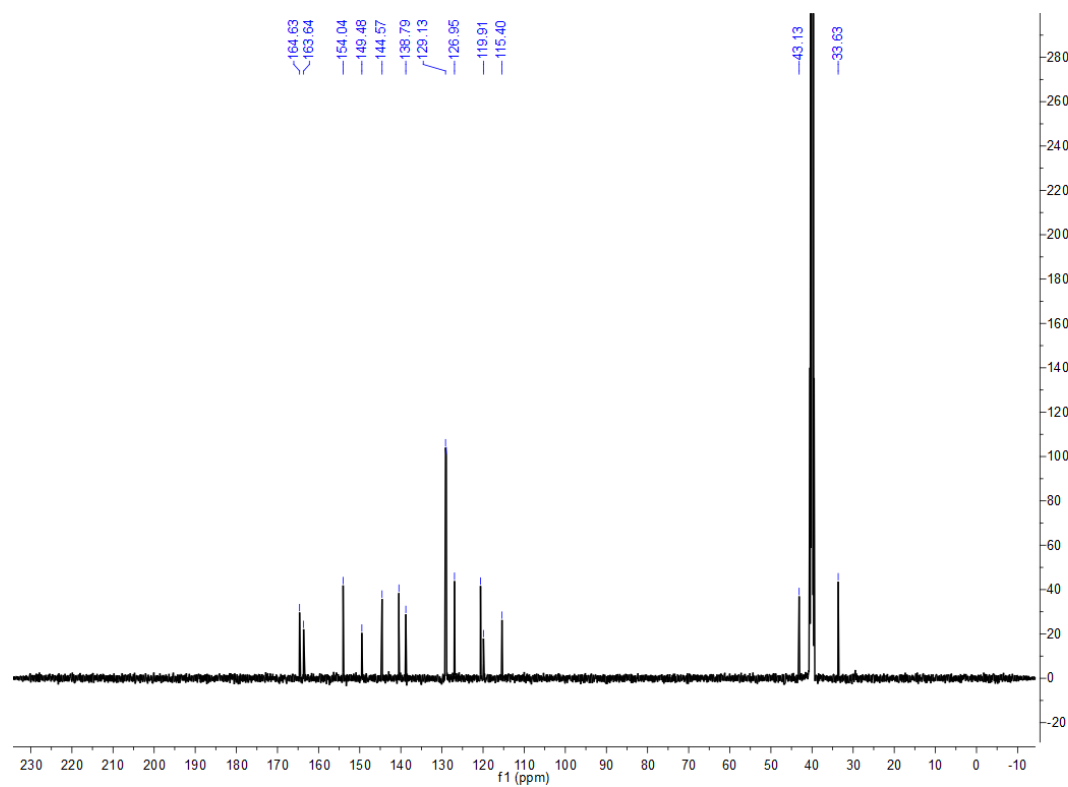

## Representative HPLC

### Compound 6b

#### LC/MS Report

File D:\DATABASE\RAWDATA\A02\LCMS\MONITOR\2019-05\2019-05-23\DZ-6B-81669-LCMSA042.D  
Injection Date : 23 May 19 3:19 pm +0800 Tgt Mass(EZX) :  
Sample Name : DZ-7A Location : P1-C-03  
Acq. Operator : A02-Monitor Inj : 1  
Spec. Reported : MS Integration Inj Volume : 5 ul  
Acq. Method : D:\METHODS\2-POS-MON-1.M  
Analysis Method : D:\METHODS\2-POS-MON-1.M  
Sample Info : Easy-Access Method: '2-POS-MON-1'  
Method Info : Mobile Phase: A: water(10mM Ammonium hydrogen carbonate) B: ACN  
Gradient: 5%-95% B in 1.5min,95%B for 1.5 min  
Flow Rate: 1.8ml/min  
Column:XBridge ,4.6\*50mm,3.5um  
Oven Temperature: 50 C  
MASS Range:100-1000

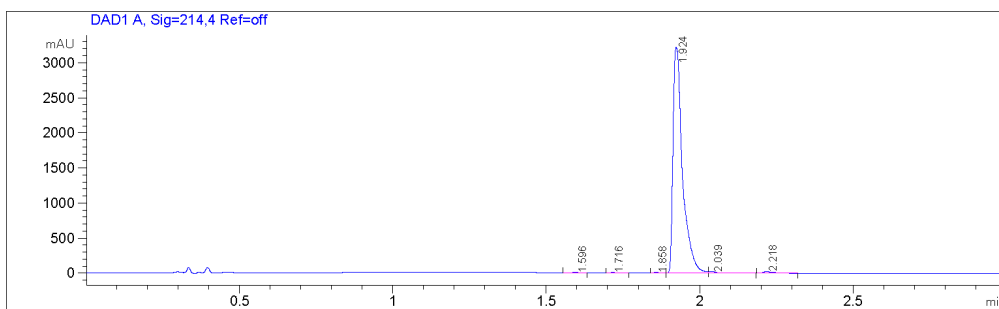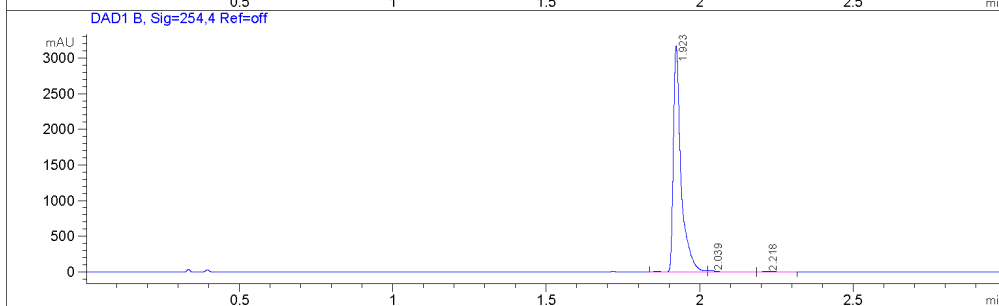

#### Integration Results for DAD1 A, Sig=214.4 Ref=off

| RetTim | Width | Area    | Height  | Area% |
|--------|-------|---------|---------|-------|
| 1.60   | 0.02  | 7.85    | 5.41    | 0.11  |
| 1.72   | 0.02  | 9.00    | 6.15    | 0.13  |
| 1.86   | 0.03  | 9.11    | 4.89    | 0.13  |
| 1.92   | 0.03  | 6871.33 | 3221.23 | 98.24 |
| 2.04   | 0.03  | 42.46   | 20.99   | 0.61  |
| 2.22   | 0.03  | 54.75   | 24.12   | 0.78  |

#### Integration Results for DAD1 B, Sig=254.4 Ref=off

| RetTim | Width | Area    | Height  | Area% |
|--------|-------|---------|---------|-------|
| 1.92   | 0.03  | 5509.22 | 3176.04 | 98.78 |
| 2.04   | 0.03  | 37.94   | 20.51   | 0.68  |
| 2.22   | 0.03  | 29.82   | 13.29   | 0.53  |

## Compound 6d

### LC/MS Report

File D:\DATABASE\RAWDATA\A02\LCMS\MONITOR\2019-05\2019-05-23\DZ-6A-81670-LCMSA042.D  
Injection Date : 23 May 19 3:23 pm +0800 Tgt Mass(EZX) :  
Sample Name : DZ-7B Location : P1-C-04  
Acq. Operator : A02-Monitor Inj : 1  
Spec. Reported : MS Integration Inj Volume : 5 ul  
Acq. Method : D:\METHODS\2-POS-MON-1.M  
Analysis Method : D:\METHODS\2-POS-MON-1.M  
Sample Info : Easy-Access Method: '2-POS-MON-1'  
Method Info : Mobile Phase: A: water(10mM Ammonium hydrogen carbonate) B: ACN  
Gradient: 5%-95% B in 1.5min,95%B for 1.5 min  
Flow Rate: 1.8ml/min  
Column: XBridge ,4.6\*50mm,3.5um  
Oven Temperature: 50 C  
MASS Range: 100-1000

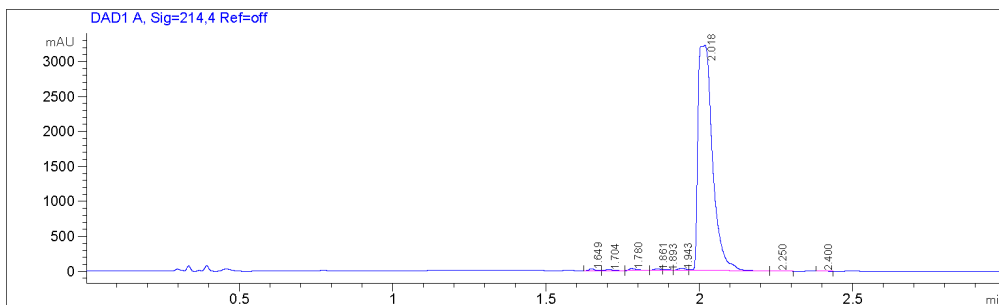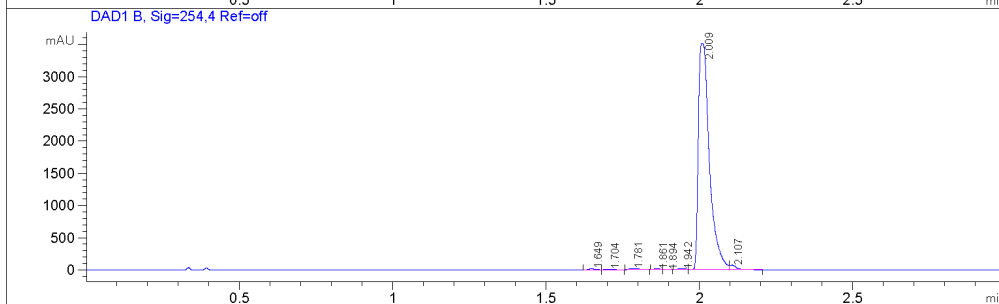

#### Integration Results for DAD1 A, Sig=214.4 Ref=off

| RetTim | Width | Area     | Height  | Area% |
|--------|-------|----------|---------|-------|
| 1.65   | 0.02  | 36.79    | 29.46   | 0.34  |
| 1.70   | 0.03  | 27.05    | 14.60   | 0.25  |
| 1.78   | 0.02  | 53.10    | 30.47   | 0.49  |
| 1.86   | 0.02  | 28.82    | 20.95   | 0.27  |
| 1.89   | 0.02  | 11.93    | 9.91    | 0.11  |
| 1.94   | 0.02  | 41.79    | 26.61   | 0.39  |
| 2.02   | 0.04  | 10543.50 | 3224.01 | 97.96 |
| 2.25   | 0.03  | 12.64    | 6.98    | 0.12  |
| 2.40   | 0.02  | 7.08     | 5.37    | 0.07  |

#### Integration Results for DAD1 B, Sig=254.4 Ref=off

| RetTim | Width | Area  | Height | Area% |
|--------|-------|-------|--------|-------|
| 1.65   | 0.02  | 22.75 | 18.54  | 0.25  |
| 1.70   | 0.03  | 15.84 | 8.59   | 0.18  |
| 1.78   | 0.03  | 37.47 | 19.09  | 0.42  |
| 1.86   | 0.02  | 14.32 | 10.60  | 0.16  |
| 1.89   | 0.02  | 6.36  | 5.36   | 0.07  |

---

LC/MS Report

|      |      |         |         |       |
|------|------|---------|---------|-------|
| 1.94 | 0.02 | 16.87   | 12.50   | 0.19  |
| 2.01 | 0.04 | 8769.60 | 3504.43 | 97.62 |
| 2.11 | 0.02 | 100.26  | 69.29   | 1.12  |

## Compound 6e

### LC/MS Report

File D:\DATABASE\RAWDATA\A02\LCMS\MONITOR\2019-05\2019-05-23\DZ-6C-81671-LCMSA042.D  
Injection Date : 23 May 19 3:27 pm +0800 Tgt Mass(EZX) :  
Sample Name : DZ-7C Location : P1-C-05  
Acq. Operator : A02-Monitor Inj : 1  
Spec. Reported : MS Integration Inj Volume : 5 ul  
Acq. Method : D:\METHODS\2-POS-MON-1.M  
Analysis Method : D:\METHODS\2-POS-MON-1.M  
Sample Info : Easy-Access Method: '2-POS-MON-1'  
Method Info : Mobile Phase: A: water(10mM Ammonium hydrogen carbonate) B: ACN  
Gradient: 5%-95% B in 1.5min,95%B for 1.5 min  
Flow Rate: 1.8ml/min  
Column:XBridge ,4.6\*50mm,3.5um  
Oven Temperature: 50 C  
MASS Range:100-1000

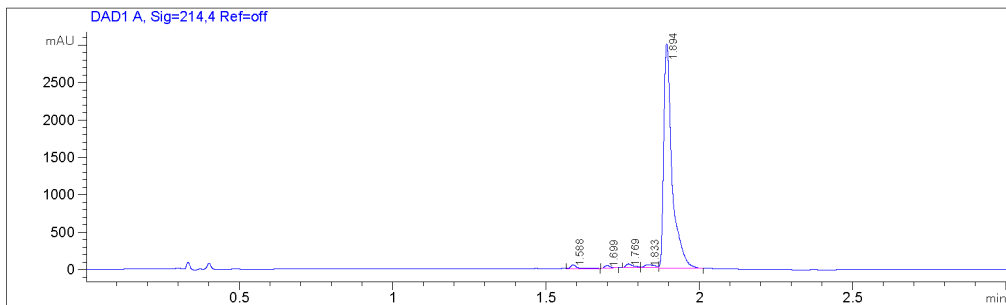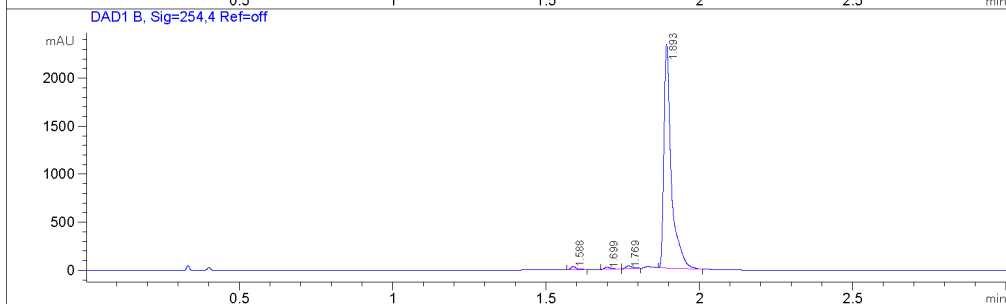

#### Integration Results for DAD1 A, Sig=214.4 Ref=off

| RetTim | Width | Area    | Height  | Area% |
|--------|-------|---------|---------|-------|
| 1.59   | 0.02  | 60.72   | 47.75   | 1.03  |
| 1.70   | 0.02  | 45.05   | 35.88   | 0.76  |
| 1.77   | 0.03  | 88.46   | 50.88   | 1.50  |
| 1.83   | 0.04  | 100.87  | 43.33   | 1.71  |
| 1.89   | 0.03  | 5611.69 | 3001.12 | 95.00 |

#### Integration Results for DAD1 B, Sig=254.4 Ref=off

| RetTim | Width | Area    | Height  | Area% |
|--------|-------|---------|---------|-------|
| 1.59   | 0.02  | 37.06   | 31.95   | 0.92  |
| 1.70   | 0.02  | 34.19   | 24.46   | 0.85  |
| 1.77   | 0.02  | 45.57   | 28.53   | 1.14  |
| 1.89   | 0.02  | 3897.72 | 2333.72 | 97.09 |



## Compound 6f

### LC/MS Report

File D:\DATABASE\RAWDATA\A02\LCMS\MONITOR\2019-05\2019-05-23\DZ-6D-81672-LCMSA042.D  
Injection Date : 23 May 19 3:32 pm +0800 Tgt Mass(EZX) :  
Sample Name : DZ-7D Location : P1-C-06  
Acq. Operator : A02-Monitor Inj : 1  
Spec. Reported : MS Integration Inj Volume : 5 ul  
Acq. Method : D:\METHODS\2-POS-MON-1.M  
Analysis Method : D:\METHODS\2-POS-MON-1.M  
Sample Info : Easy-Access Method: '2-POS-MON-1'  
Method Info : Mobile Phase: A: water(10mM Ammonium hydrogen carbonate) B: ACN  
Gradient: 5%-95% B in 1.5min,95%B for 1.5 min  
Flow Rate: 1.8ml/min  
Column:XBridge ,4.6\*50mm,3.5um  
Oven Temperature: 50 C  
MASS Range:100-1000

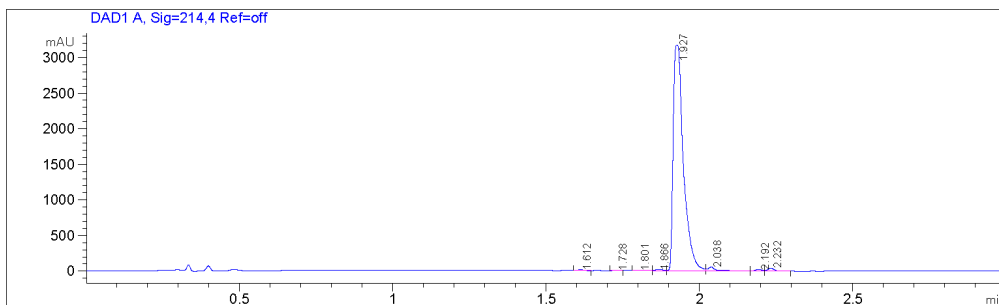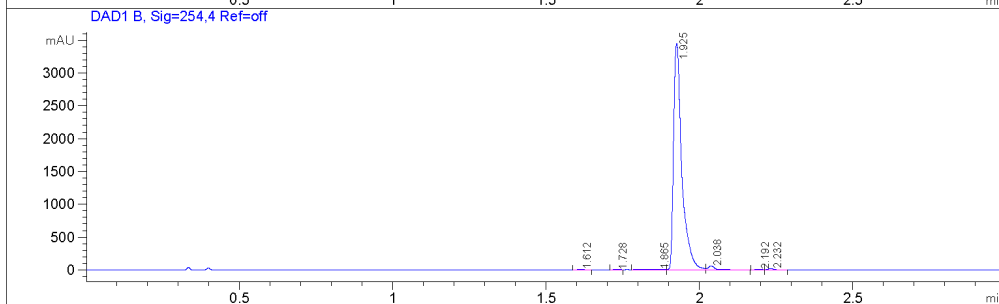

#### Integration Results for DAD1 A, Sig=214.4 Ref=off

| RetTim | Width | Area    | Height  | Area% |
|--------|-------|---------|---------|-------|
| 1.61   | 0.02  | 12.63   | 12.36   | 0.17  |
| 1.73   | 0.02  | 9.79    | 8.66    | 0.13  |
| 1.80   | 0.04  | 19.42   | 7.01    | 0.26  |
| 1.87   | 0.03  | 25.87   | 13.67   | 0.34  |
| 1.93   | 0.03  | 7305.35 | 3172.71 | 96.84 |
| 2.04   | 0.02  | 86.34   | 51.30   | 1.14  |
| 2.19   | 0.02  | 27.05   | 19.96   | 0.36  |
| 2.23   | 0.02  | 57.30   | 41.57   | 0.76  |

#### Integration Results for DAD1 B, Sig=254.4 Ref=off

| RetTim | Width | Area    | Height  | Area% |
|--------|-------|---------|---------|-------|
| 1.61   | 0.02  | 10.73   | 9.89    | 0.16  |
| 1.73   | 0.02  | 7.38    | 6.47    | 0.11  |
| 1.80   | 0.04  | 31.68   | 9.57    | 0.48  |
| 1.93   | 0.03  | 6433.33 | 3449.72 | 97.19 |
| 2.04   | 0.02  | 91.42   | 60.32   | 1.38  |
| 2.19   | 0.02  | 17.32   | 12.71   | 0.26  |

---

LC/MS Report

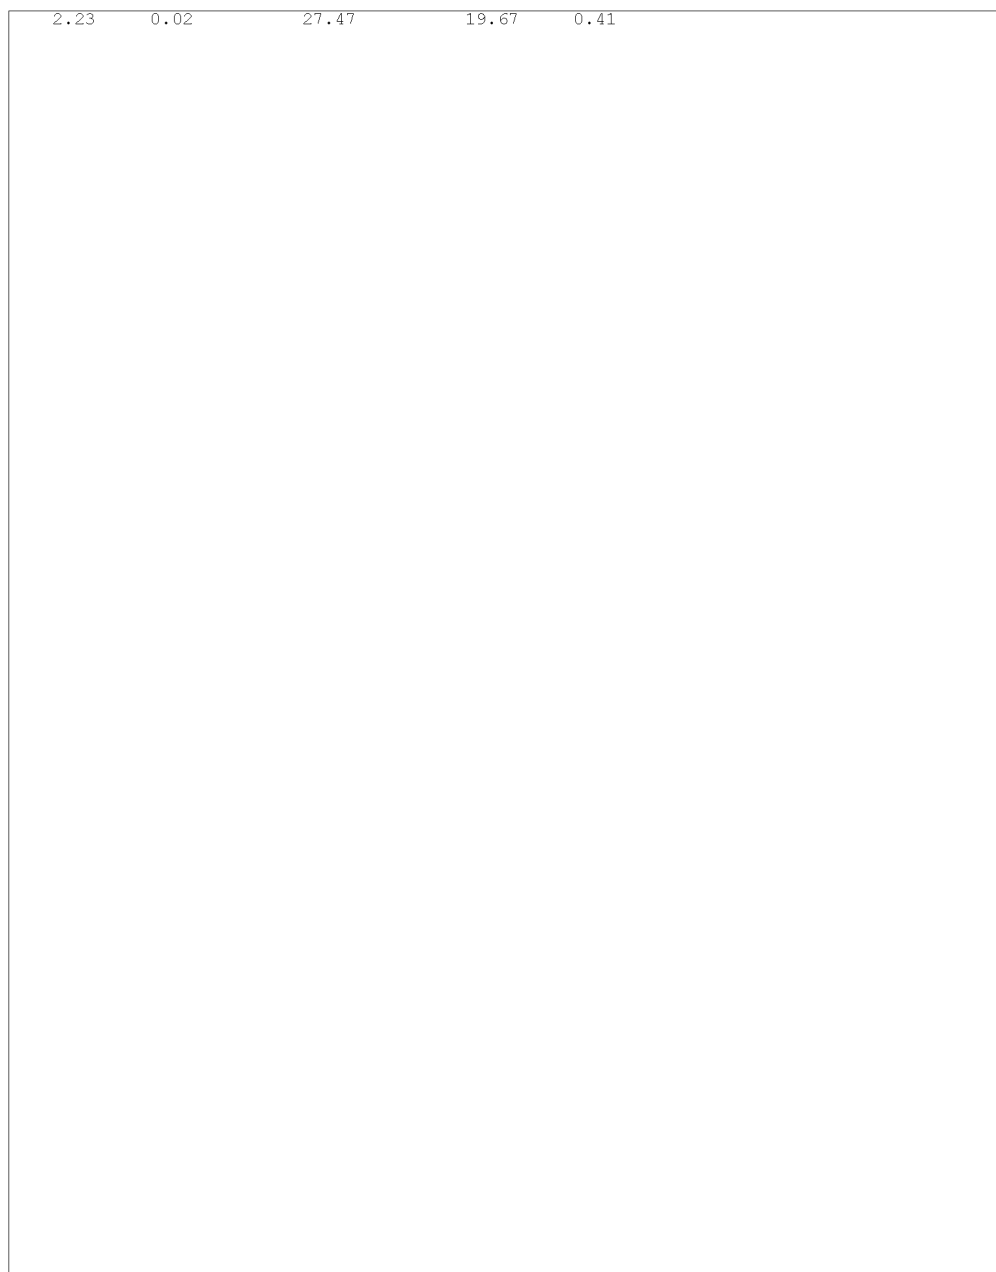

## Compound 6lc

### LC/MS Report

File D:\DATABASE\RAWDATA\A02\LCMS\MONITOR\2019-05\2019-05-23\DZ-6ac-81666-LCMSA042.D  
Injection Date : 23 May 19 3:03 pm +0800 Tgt Mass(EZX) :  
Sample Name : DZ-7AJ Location : P1-B-09  
Acq. Operator : A02-Monitor Inj : 1  
Spec. Reported : MS Integration Inj Volume : 5 ul  
Acq. Method : D:\METHODS\2-POS-MON-1.M  
Analysis Method : D:\METHODS\2-POS-MON-1.M  
Sample Info : Easy-Access Method: '2-POS-MON-1'  
Method Info : Mobile Phase: A: water(10mM Ammonium hydrogen carbonate) B: ACN  
Gradient: 5%-95% B in 1.5min,95%B for 1.5 min  
Flow Rate: 1.8ml/min  
Column:XBridge ,4.6\*50mm,3.5um  
Oven Temperature: 50 C  
MASS Range:100-1000

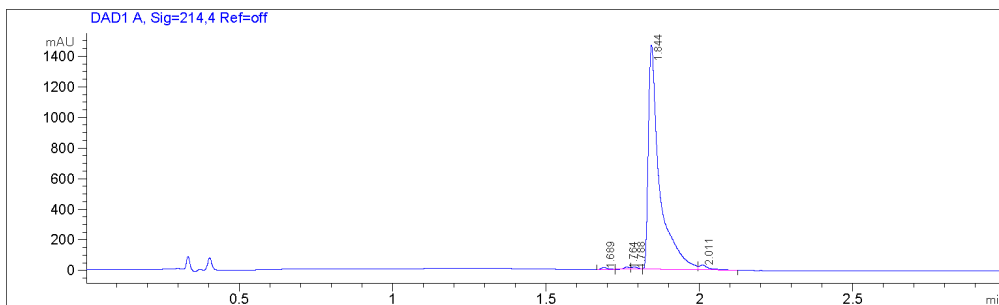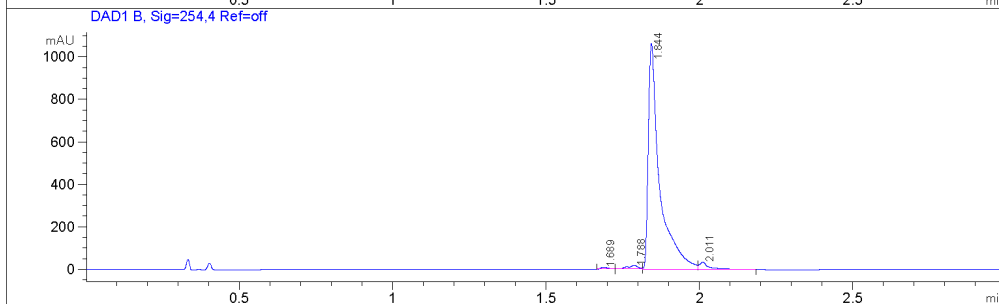

#### Integration Results for DAD1 A, Sig=214.4 Ref=off

| RetTim | Width | Area    | Height  | Area% |
|--------|-------|---------|---------|-------|
| 1.69   | 0.02  | 17.20   | 12.58   | 0.44  |
| 1.76   | 0.02  | 17.09   | 13.69   | 0.44  |
| 1.79   | 0.02  | 18.69   | 13.39   | 0.48  |
| 1.84   | 0.04  | 3743.67 | 1468.42 | 96.82 |
| 2.01   | 0.03  | 69.85   | 32.24   | 1.81  |

#### Integration Results for DAD1 B, Sig=254.4 Ref=off

| RetTim | Width | Area    | Height  | Area% |
|--------|-------|---------|---------|-------|
| 1.69   | 0.02  | 13.00   | 9.43    | 0.46  |
| 1.79   | 0.03  | 37.84   | 17.09   | 1.33  |
| 1.84   | 0.04  | 2723.94 | 1063.40 | 95.59 |
| 2.01   | 0.03  | 74.87   | 33.50   | 2.63  |

## Compound 7g

### LC/MS Report

File D:\DATABASE\RAWDATA\A02\LCMS\MONITOR\2019-06\2019-06-21\7g-83249-LCMSA042.D  
Injection Date : 21 Jun 19 3:39 pm +0800 Tgt Mass(EZX) :  
Sample Name : 8H Location : P2-A-05  
Acq. Operator : A02-Monitor Inj : 1  
Spec. Reported : MS Integration Inj Volume : 2 ul  
Acq. Method : D:\METHODS\2-POS-MON-1.M  
Analysis Method : D:\METHODS\2-POS-MON-1.M  
Sample Info : Easy-Access Method: '2-POS-MON-1'  
Method Info : Mobile Phase: A: water(10mM Ammonium hydrogen carbonate) B: ACN  
Gradient: 5%-95% B in 1.5min,95%B for 1.5 min  
Flow Rate: 1.8ml/min  
Column:XBridge ,4.6\*50mm,3.5um  
Oven Temperature: 50 C  
MASS Range:100-1000

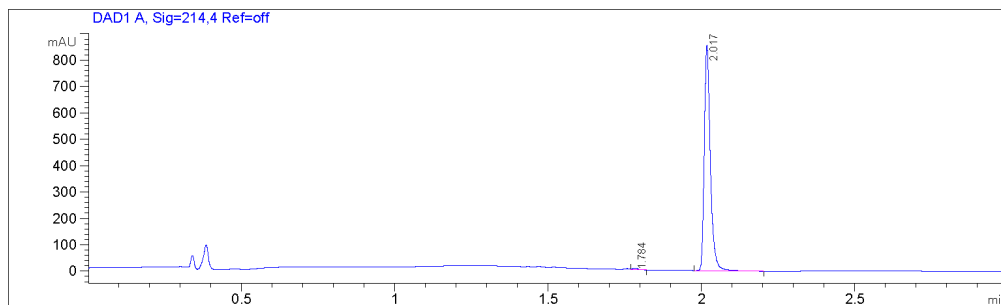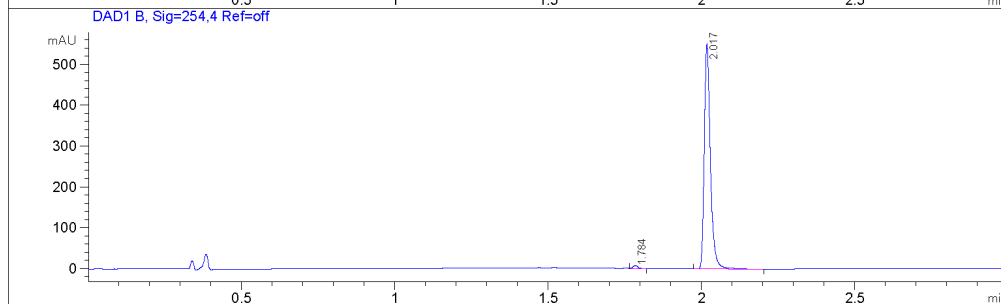

#### Integration Results for DAD1 A, Sig=214.4 Ref=off

| RetTim | Width | Area    | Height | Area% |
|--------|-------|---------|--------|-------|
| 1.78   | 0.02  | 7.38    | 6.55   | 0.62  |
| 2.02   | 0.02  | 1173.36 | 856.01 | 99.38 |

#### Integration Results for DAD1 B, Sig=254.4 Ref=off

| RetTim | Width | Area   | Height | Area% |
|--------|-------|--------|--------|-------|
| 1.78   | 0.02  | 7.43   | 7.13   | 0.97  |
| 2.02   | 0.02  | 761.14 | 552.63 | 99.03 |

# Compound 13a

## LC/MS Report

File D:\DATA\A02\MONITOR\13a-83256-LCMSA042.D  
Injection Date : 21 Jun 19 4:08 pm +0800 Tgt Mass(EZX) :  
Sample Name : 11C Location : P2-B-03  
Acq. Operator : A02-Monitor Inj : 1  
Spec. Reported : MS Integration Inj Volume : 5 ul  
Acq. Method : D:\METHODS\2-POS-MON-1.M  
Analysis Method : D:\METHODS\2-POS-MON-1.M  
Sample Info : Easy-Access Method: '2-POS-MON-1'  
Method Info : Mobile Phase: A: water(10mM Ammonium hydrogen carbonate) B: ACN  
Gradient: 5%-95% B in 1.5min,95%B for 1.5 min  
Flow Rate: 1.8ml/min  
Column:XBridge ,4.6\*50mm,3.5um  
Oven Temperature: 50 C  
MASS Range:100-1000

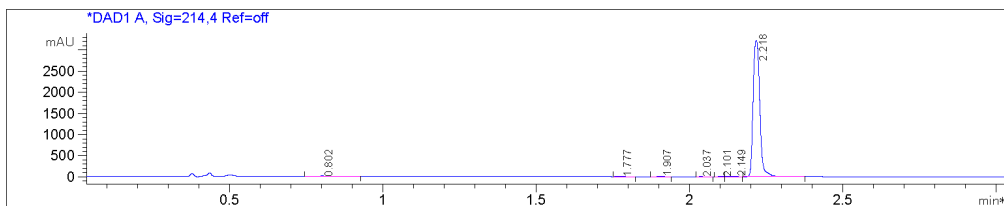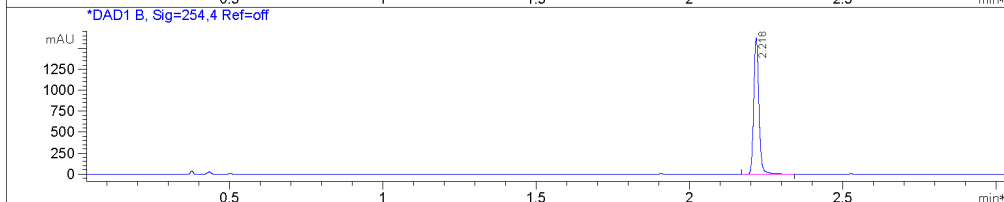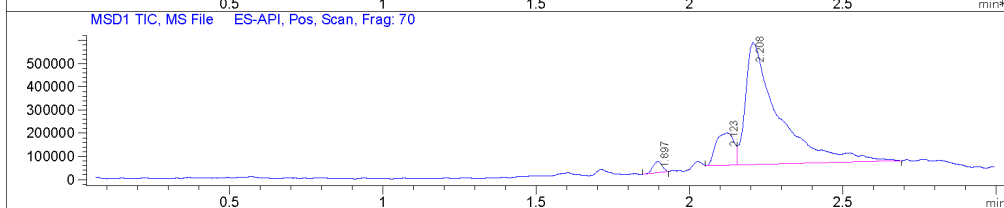

### Integration Results for DAD1 A, Sig=214,4 Ref=off

| RetTim | Width | Area    | Height  | Area% |
|--------|-------|---------|---------|-------|
| 0.80   | 0.02  | 10.94   | 7.67    | 0.22  |
| 1.78   | 0.02  | 8.51    | 7.28    | 0.17  |
| 1.91   | 0.02  | 15.39   | 13.32   | 0.31  |
| 2.04   | 0.02  | 8.32    | 6.13    | 0.17  |
| 2.10   | 0.02  | 11.76   | 10.05   | 0.24  |
| 2.15   | 0.03  | 21.50   | 11.84   | 0.44  |
| 2.22   | 0.02  | 4830.27 | 3226.36 | 98.44 |

### Integration Results for DAD1 B, Sig=254,4 Ref=off

| RetTim | Width | Area    | Height  | Area%  |
|--------|-------|---------|---------|--------|
| 2.22   | 0.02  | 1882.03 | 1627.06 | 100.00 |

## Compound 13b

### LC/MS Report

File D:\DATA\A02\MONITOR\13b-83257-LCMSA042.D  
Injection Date : 21 Jun 19 4:12 pm +0800 Tgt Mass(EZX) :  
Sample Name : 11G Location : P2-B-04  
Acq. Operator : A02-Monitor Inj : 1  
Spec. Reported : MS Integration Inj Volume : 5 ul  
Acq. Method : D:\METHODS\2-POS-MON-1.M  
Analysis Method : D:\METHODS\2-POS-MON-1.M  
Sample Info : Easy-Access Method: '2-POS-MON-1'  
Method Info : Mobile Phase: A: water(10mM Ammonium hydrogen carbonate) B: ACN  
Gradient: 5%-95% B in 1.5min,95%B for 1.5 min  
Flow Rate: 1.8ml/min  
Column:XBridge ,4.6\*50mm,3.5um  
Oven Temperature: 50 C  
MASS Range:100-1000

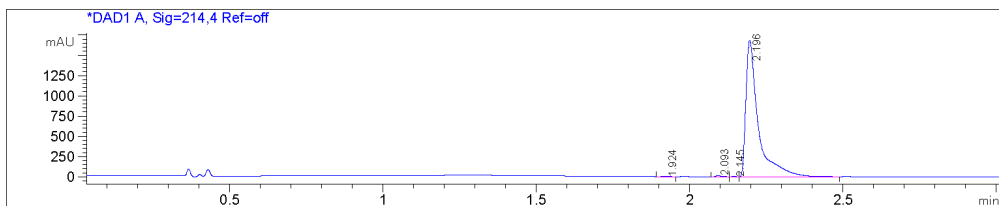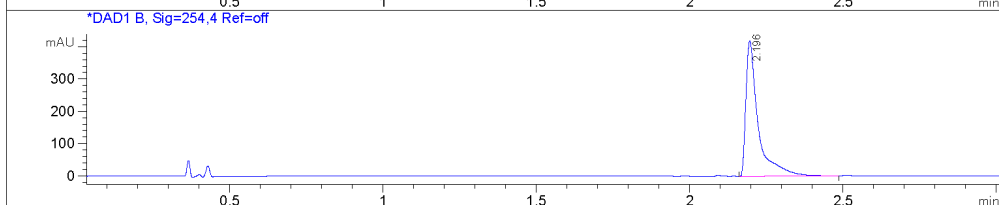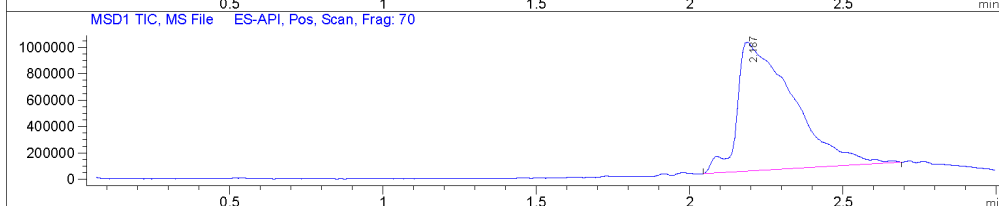

#### Integration Results for DAD1 A, Sig=214,4 Ref=off

| RetTim | Width | Area    | Height  | Area% |
|--------|-------|---------|---------|-------|
| 1.92   | 0.02  | 6.12    | 5.35    | 0.13  |
| 2.09   | 0.02  | 22.12   | 16.32   | 0.47  |
| 2.14   | 0.02  | 5.24    | 5.70    | 0.11  |
| 2.20   | 0.04  | 4702.02 | 1685.49 | 99.29 |

#### Integration Results for DAD1 B, Sig=254,4 Ref=off

| RetTim | Width | Area    | Height | Area%  |
|--------|-------|---------|--------|--------|
| 2.20   | 0.04  | 1170.77 | 420.79 | 100.00 |

## Compound 14a

### LC/MS Report

File D:\DATA\A02\MONITOR\14a-83260-LCMSA042.D  
Injection Date : 21 Jun 19 4:25 pm +0800 Tgt Mass(EZX) :  
Sample Name : 12C Location : P2-B-07  
Acq. Operator : A02-Monitor Inj : 1  
Spec. Reported : MS Integration Inj Volume : 5 ul  
Acq. Method : D:\METHODS\2-POS-MON-1.M  
Analysis Method : D:\METHODS\2-POS-MON-1.M  
Sample Info : Easy-Access Method: '2-POS-MON-1'  
Method Info : Mobile Phase: A: water(10mM Ammonium hydrogen carbonate) B: ACN  
Gradient: 5%-95% B in 1.5min,95%B for 1.5 min  
Flow Rate: 1.8ml/min  
Column:XBridge ,4.6\*50mm,3.5um  
Oven Temperature: 50 C  
MASS Range:100-1000

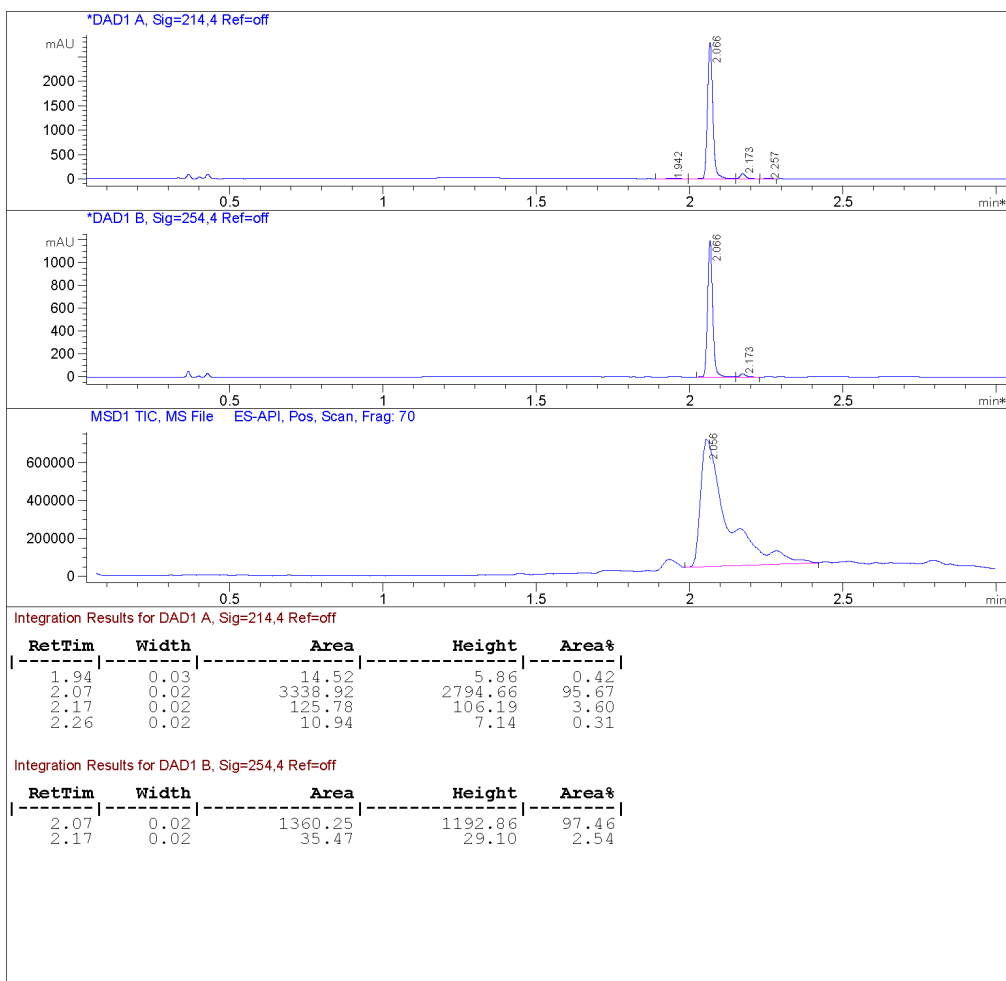

## Compound 14b

### LC/MS Report

File D:\DATA\A02\MONITOR\14b-83261-LCMSA042.D  
Injection Date : 21 Jun 19 4:29 pm +0800 Tgt Mass(EZX) :  
Sample Name : 12G Location : P2-B-08  
Acq. Operator : A02-Monitor Inj : 1  
Spec. Reported : MS Integration Inj Volume : 5 uL  
Acq. Method : D:\METHODS\2-POS-MON-1.M  
Analysis Method : D:\METHODS\2-POS-MON-1.M  
Sample Info : Easy-Access Method: '2-POS-MON-1'  
Method Info : Mobile Phase: A: water(10mM Ammonium hydrogen carbonate) B: ACN  
Gradient: 5%-95% B in 1.5min,95%B for 1.5 min  
Flow Rate: 1.8ml/min  
Column:XBridge ,4.6\*50mm,3.5um  
Oven Temperature: 50 C  
MASS Range:100-1000

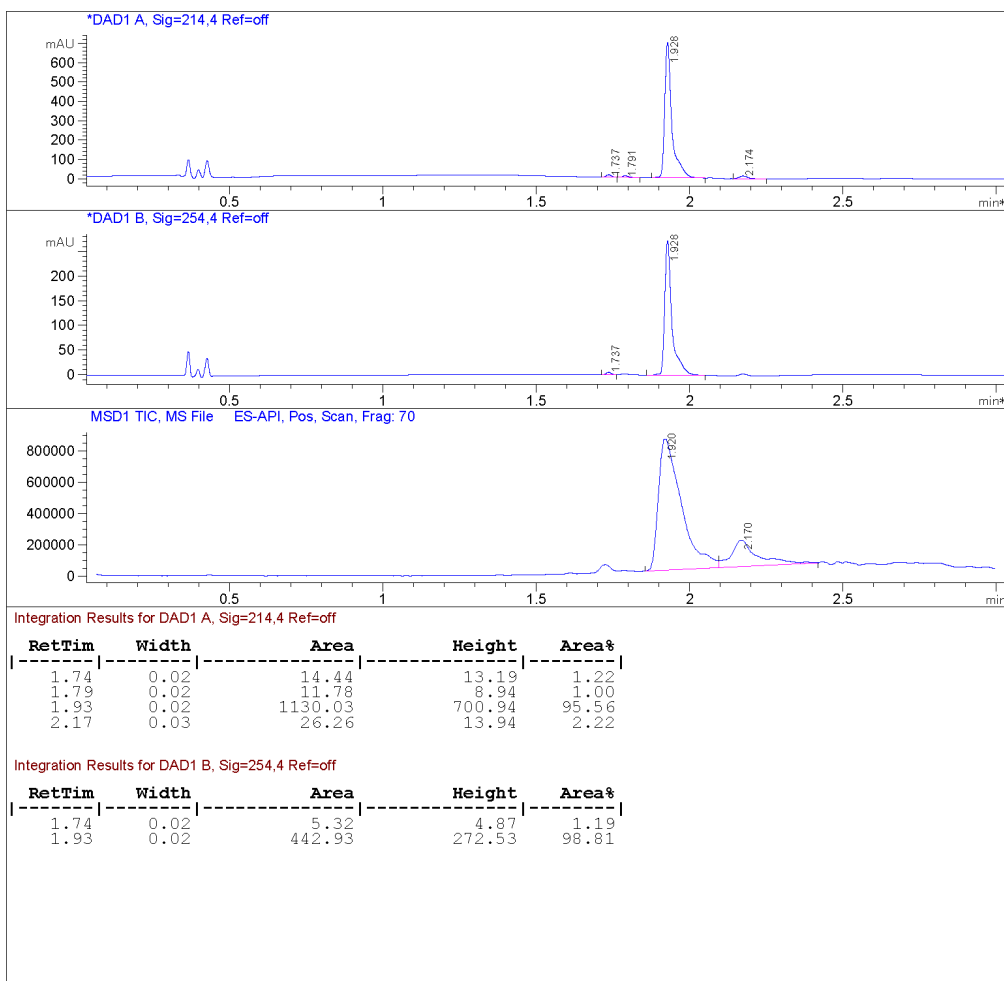

Supplement: Supplementary file 1 [file 22438448]
